# Supplementary material for: Direct C(sp2)–H alkylation of unactivated arenes enabled by photoinduced Pd catalysis
Source: PubMed Central journal article supplement (PMC7572399; doi:10.1038/s41467-020-19038-8), 2020-10-19

## Supporting Information

# Palladium-Catalyzed Direct C–H Arylation of Arenes Promoted by Quaternary Ammonium Salt

Sabyuk Yang,<sup>[b]</sup> Soon Hyeok Hong<sup>\*[a]</sup>

[a] Department of Chemistry, Korea Advanced Institute of Science and Technology (KAIST), Daejeon 34141, Republic of Korea

[b] Department of Chemistry, College of Natural Sciences, Seoul National University, Seoul 08826, Republic of Korea

## Table of Contents

### I. Experimental section

1. General information (S2)
2. Complementary reaction optimization data (S3)
3. Homo/heterogeneity studies (S7)
4. Kinetic studies (S9)
5. Gram scale reaction (S15)
6. Synthesis of compounds used in homo/heterogeneity studies (S16)
7. Characterization of products (S18)

### II. References (S25)

### III. NMR spectra (S26)

# I. Experimental section

## 1. General information

Unless otherwise stated, all reactions were carried out using standard Schlenk techniques or in an argon-filled glove box. All anhydrous solvents were purchased from Aldrich and used without further purification. All 1D NMR spectroscopy experiments were conducted with a Varian 400 and 500 MHz. NMR spectra were processed with MestReNova. Chemical shifts are reported in ppm and referenced to residual solvent peaks ( $\text{CHCl}_3$  in  $\text{CDCl}_3$ : 7.26 ppm for  $^1\text{H}$ , 77 ppm for  $^{13}\text{C}$ ). Coupling constants are reported in Hertz. GC analyses were carried out with a 7980A GC system from Agilent Technologies, equipped with an HP-5 column and FID detector using dodecane as internal standard. FT-IR spectra were recorded on a PerkinElmer FT-IR spectrometer. Transmission electron microscopy (TEM) image was acquired on a Hitachi 7600 operating at 100 kV. Elemental analyses were conducted at the National Center for Inter-University Research Facilities of Seoul National University (NCIRF) using a Thermo Scientific Flash 2000 elemental analyzer and a Bruker Avance-600, respectively. All starting materials and reagents were purchased from Acros, Aldrich, Alfa Aesar, TCI, and Strem Chemical Inc., and used without further purification unless otherwise stated.

## 2. Complementary reaction optimization data

Table S1. Base screening<sup>a</sup>

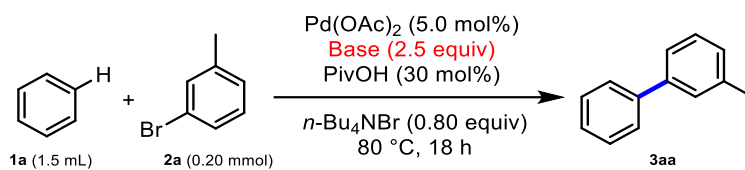

| Entry | Base                            | Yield (%) <sup>b</sup> | Entry | Base                            | Yield (%) <sup>b</sup> |
|-------|---------------------------------|------------------------|-------|---------------------------------|------------------------|
| 1     | Li <sub>2</sub> CO <sub>3</sub> | N. R.                  | 6     | Cs <sub>2</sub> CO <sub>3</sub> | 61                     |
| 2     | Na <sub>2</sub> CO <sub>3</sub> | N. R.                  | 6     | K <sub>3</sub> PO <sub>4</sub>  | 44                     |
| 3     | K <sub>2</sub> CO <sub>3</sub>  | 25                     | 7     | CsOPiv                          | 21                     |
| 4     | Rb <sub>2</sub> CO <sub>3</sub> | 72                     | 8     | CsF                             | >99 <sup>c, d</sup>    |

<sup>a</sup> Reaction conditions: **1a** (1.5 mL), **2a** (0.20 mmol), Pd(OAc)<sub>2</sub> (5.0 mol%), base (2.5 equiv), PivOH (30 mol%), *n*-Bu<sub>4</sub>NBr (0.80 equiv), 80 °C, 18 h.

<sup>b</sup> Determined by gas chromatography using dodecane as an internal standard.

<sup>c</sup> Isolated yield.

<sup>d</sup> CsOPiv (0.80 equiv) used as an additional reagent.

**Table S2. Ammonium salt screening<sup>a</sup>**

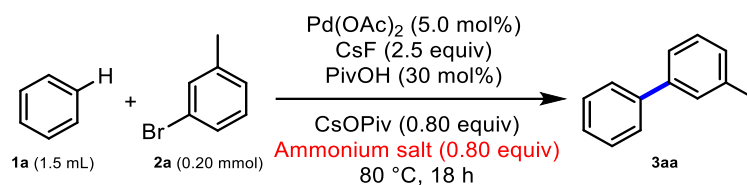

| Entry | Ammonium salt                 | Yield (%) <sup>b</sup> | Entry | Ammonium salt                  | Yield (%) <sup>b</sup> |
|-------|-------------------------------|------------------------|-------|--------------------------------|------------------------|
| 1     | NH <sub>4</sub> Br            | 3                      | 6     | <i>n</i> -Bu <sub>4</sub> NOAc | 66                     |
| 2     | Me <sub>4</sub> NOAc          | N. R.                  | 7     | <i>n</i> -Bu <sub>4</sub> NTFA | 27                     |
| 3     | <i>n</i> -Bu <sub>4</sub> NCl | 79                     | 8     | Me <sub>4</sub> NBr            | N. R.                  |
| 4     | <i>n</i> -Bu <sub>4</sub> NBr | >99 <sup>c</sup>       | 9     | <i>n</i> -Hex <sub>4</sub> NBr | 77                     |
| 5     | <i>n</i> -Bu <sub>4</sub> NI  | 3                      | 10    | <i>n</i> -Oc <sub>4</sub> NBr  | 65                     |

<sup>a</sup> Reaction conditions: **1a** (1.5 mL), **2a** (0.20 mmol), Pd(OAc)<sub>2</sub> (5.0 mol%), CsF (2.5 equiv), PivOH (30 mol%), CsOPiv (0.80 equiv), ammonium salt (0.80 equiv), 80 °C, 18 h.

<sup>b</sup> Determined by gas chromatography using dodecane as an internal standard.

<sup>c</sup> Isolated yield.

**Table S3. Temperature screening<sup>a</sup>**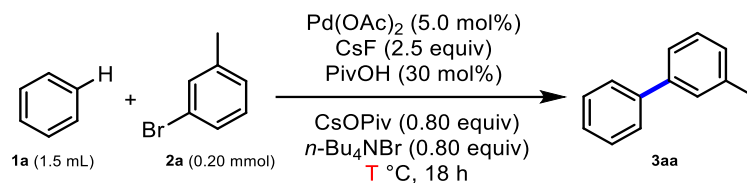

| Entry | Temp (°C) | Yield (%) <sup>b</sup> |
|-------|-----------|------------------------|
| 1     | 50        | N. R.                  |
| 2     | 60        | 36                     |
| 3     | 65        | 68                     |
| 4     | 70        | 90                     |
| 5     | 80        | >99 <sup>c</sup>       |

<sup>a</sup> Reaction conditions: **1a** (1.5 mL), **2a** (0.20 mmol), Pd(OAc)<sub>2</sub> (5.0 mol%), CsF (2.5 equiv), PivOH (30 mol%), CsOPiv (0.80 equiv), *n*-Bu<sub>4</sub>NBr (0.80 equiv), T °C, 18 h.

<sup>b</sup> Determined by gas chromatography using dodecane as an internal standard.

<sup>c</sup> Isolated yield.

**Table S4. Catalyst screening<sup>a</sup>**

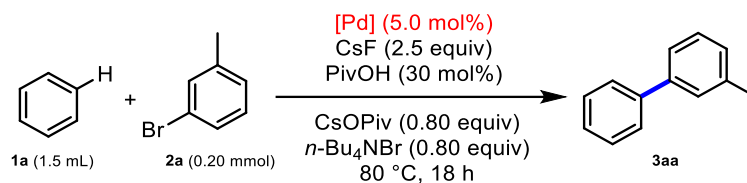

| Entry | Catalyst                                                      | Yield (%) <sup>b</sup> | Entry | Catalyst                                            | Yield (%) <sup>b</sup> |
|-------|---------------------------------------------------------------|------------------------|-------|-----------------------------------------------------|------------------------|
| 1     | PdBr <sub>2</sub>                                             | 91                     | 8     | Pd(CH <sub>3</sub> CN) <sub>2</sub> Cl <sub>2</sub> | 72                     |
| 2     | PdCl <sub>2</sub>                                             | 95                     | 9     | Pd <sub>2</sub> (dba) <sub>3</sub>                  | 33                     |
| 3     | Pd(OAc) <sub>2</sub>                                          | >99 <sup>c</sup>       | 10    | Pd(acac) <sub>2</sub>                               | N. R.                  |
| 4     | Pd(OPiv) <sub>2</sub>                                         | 92                     | 11    | Pd/C                                                | N. R.                  |
| 5     | PdBr <sub>4</sub> ( <i>n</i> -Bu <sub>4</sub> N) <sub>2</sub> | 92                     | 12    | Pd(OH) <sub>2</sub> /C                              | N. R.                  |
| 6     | Pd(PPh <sub>3</sub> ) <sub>4</sub>                            | N. R.                  | 13    | Pd/CaCO <sub>3</sub>                                | N. R.                  |
| 7     | PdCl <sub>2</sub> (PPh <sub>3</sub> ) <sub>2</sub>            | N. R.                  |       |                                                     |                        |

<sup>a</sup> Reaction conditions: **1a** (1.5 mL), **2a** (0.20 mmol), palladium catalyst (5.0 mol%), CsF (2.5 equiv), PivOH (30 mol%), CsOPiv (0.80 equiv), *n*-Bu<sub>4</sub>NBr (0.80 equiv), 80 °C, 18 h.

<sup>b</sup> Determined by gas chromatography using dodecane as an internal standard.

<sup>c</sup> Isolated yield.

### 3. Homo/heterogeneity studies

#### 3.1. Procedure for hot filtration

A 10 mL Schlenk tube was charged with 3-bromotoluene (0.20 mmol), cesium fluoride (2.5 equiv), cesium pivalate (0.80 equiv), palladium acetate (5.0 mol%), pivalic acid (30 mol%), tetra-*n*-butylammonium bromide (0.80 equiv), benzene (1.5 mL), and dodecane (0.20 mmol) as an internal standard inside an argon-filled glove box. The reaction vessel was placed in an oil bath and heated to 80 °C. After 3 h (condition A), a small aliquot was withdrawn and analyzed by GC, and then, the supernatant solution was filtered through a glass frit with a filter aid such as Hyflo Super Cel (Alfa Aesar), using a cannula,<sup>[1]</sup> into a new 10 mL Schlenk tube containing cesium fluoride (2.5 equiv) and cesium pivalate (0.80 equiv) (condition C). Benzene was added to the original Schlenk tube and transferred, with filtration repeated for 3–4 times. The remaining precipitate in the original Schlenk tube was charged with 3-bromotoluene (0.20 mmol), pivalic acid (30 mol%), tetra-*n*-butylammonium bromide (0.80 equiv), dodecane (0.20 mmol) containing solution in benzene (1.5 mL) (condition B). Both tubes were placed in an oil bath and stirred under 80 °C for 18 h. Then, small aliquots were withdrawn from both tubes and analyzed by GC.

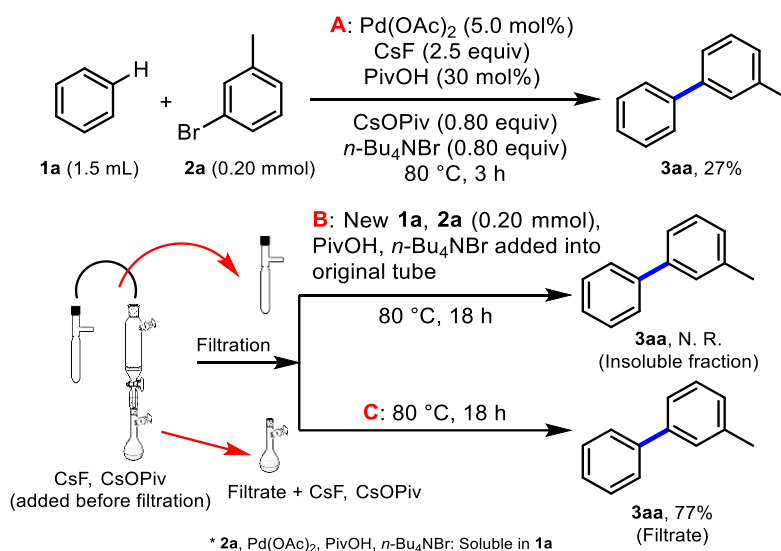

**Scheme S1.** Hot filtration test

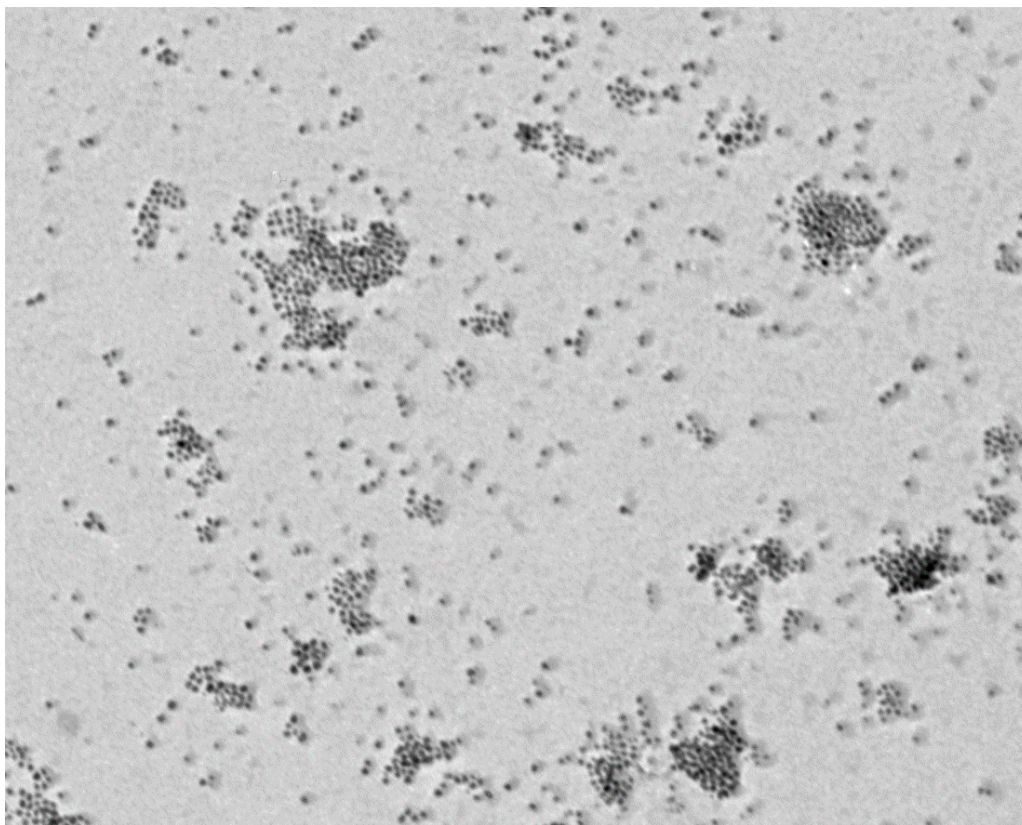

2.6.tif  
2.6  
Cal: 1.664pix/nm  
14:53 02-21-18  
TEM Mode: Imaging

100 nm  
HV=100kV  
Direct Mag: 30000x  
X: 34.1 Y: 465.3 T:0.0  
AMT Camera System

**Figure S1.** TEM image of the insoluble fraction after 18 h.



## 4. Kinetic Studies

### 4.1. Procedure for KIE experiments

The KIE was determined by comparing the initial reaction rates of the reactions with benzene and benzene- $d_6$ . Both reactions were conducted using the above general procedure with the following modifications. After adding all the reagents, 3-bromotoluene (0.20 mmol) and dodecane (0.20 mmol) as an internal standard were added to a 10 mL Schlenk tube, and each tube was heated to 80 °C in an oil bath. At the required time period, each tube was immediately placed into an ice bath, and a small aliquot was withdrawn. Each aliquot was filtered through Celite and then analyzed by GC.

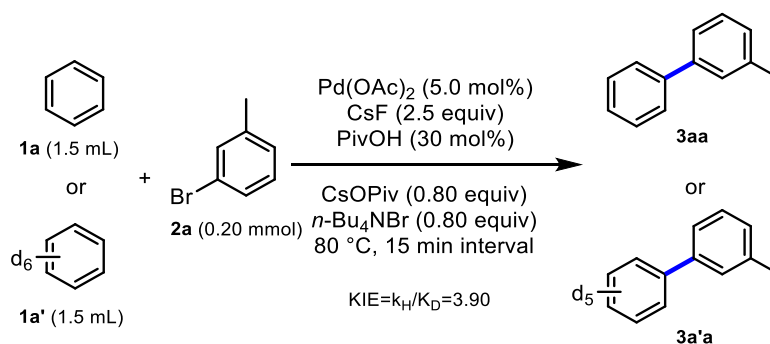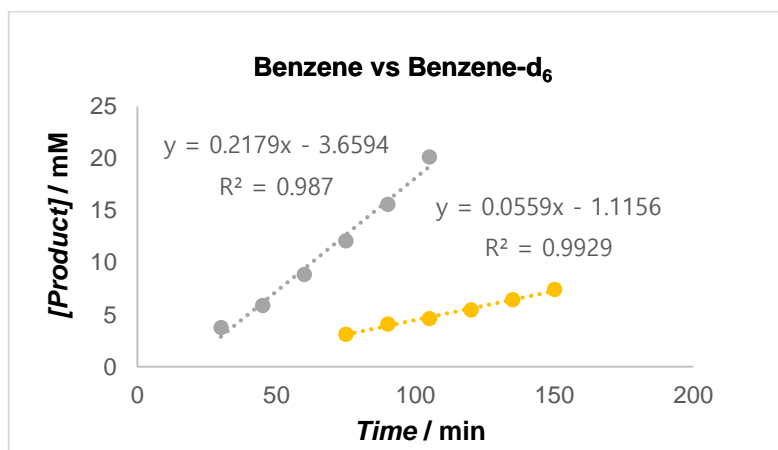

**Figure S2.** Initial rates of the C–H arylation of benzene and benzene- $d_6$

## 4.2. Kinetic data

### 4.2.1. Order in [Pd]

The order in [Pd] was determined by obtaining the initial rate of the C–H arylation with varying concentrations of Pd(OAc)<sub>2</sub>. Each reaction was conducted using the general procedure with the following modifications. After adding all the reagents, varying amounts of Pd(OAc)<sub>2</sub> and dodecane (0.20 mmol) as an internal standard were added to a 10 mL Schlenk tube, and each tube was heated to 80 °C in an oil bath. At the required time period, each tube was immediately placed into an ice bath, and then a small aliquot was withdrawn. Each aliquot was filtered through Celite and then analyzed by GC.

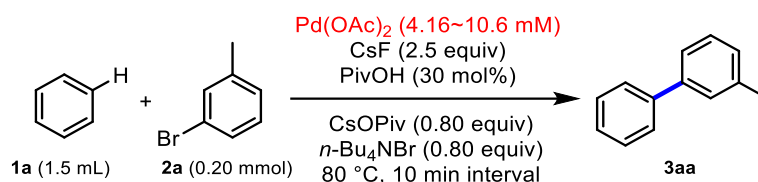

**Table S5.** Amounts of Pd(OAc)<sub>2</sub> and results used to determine the order in Pd(OAc)<sub>2</sub>

| Entry | Amount of Pd(OAc) <sub>2</sub> |         |      | Rate (mM/min) |
|-------|--------------------------------|---------|------|---------------|
|       | mg                             | mmol    | mM   |               |
| 1     | 1.40                           | 0.06236 | 4.16 | 0.0784        |
| 2     | 2.24                           | 0.09978 | 6.65 | 0.1238        |
| 3     | 2.76                           | 0.01229 | 8.20 | 0.1466        |
| 4     | 3.21                           | 0.01430 | 9.53 | 0.2201        |
| 5     | 3.58                           | 0.01595 | 10.6 | 0.2883        |

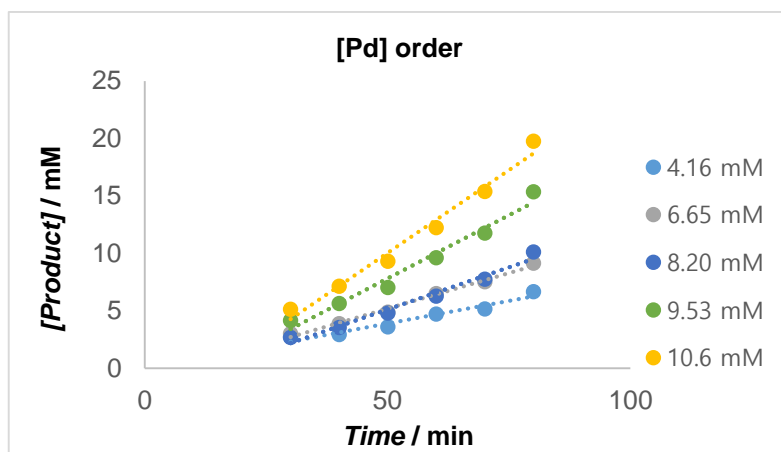

**Figure S3.** Initial rates of the C–H arylation with varying concentrations of Pd(OAc)<sub>2</sub>

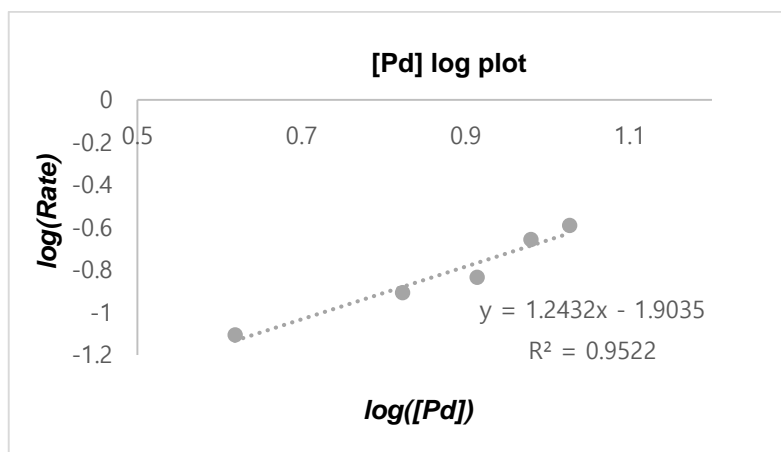

**Figure S4.** Log plot of initial rates with varying Pd(OAc)<sub>2</sub>

#### 4.2.2. Order in [ArBr]

The order in [ArBr] was determined by obtaining the initial rate of the C–H arylation with varying concentrations of 3-bromotoluene. Each reaction was conducted using the general procedure with the following modifications. After adding all the reagents, varying amounts of 3-bromotoluene and dodecane (0.20 mmol) as an internal standard were added to a 10 mL Schlenk tube, and each tube was heated to 80 °C in an oil bath. At the required time period, each tube was immediately placed into an ice bath, and then a small aliquot was withdrawn. Each aliquot was filtered through Celite and then analyzed by GC.

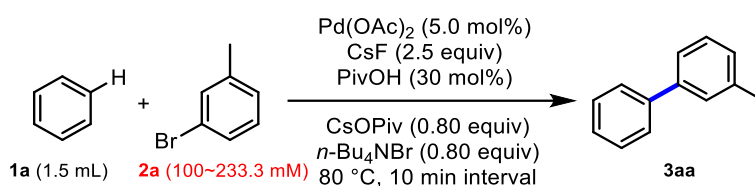

**Table S6.** Amounts of 3-bromotoluene and results used to determine the order in 3-bromotoluene

| Entry | Amount of 3-bromotoluene |      |       | Rate (mM/min) |
|-------|--------------------------|------|-------|---------------|
|       | μL                       | mmol | mM    |               |
| 1     | 18                       | 0.15 | 100   | 0.1469        |
| 2     | 24                       | 0.20 | 133.3 | 0.2279        |
| 3     | 30                       | 0.25 | 166.7 | 0.2047        |
| 4     | 36.3                     | 0.30 | 200   | 0.1828        |
| 5     | 42.5                     | 0.35 | 233.3 | 0.1185        |

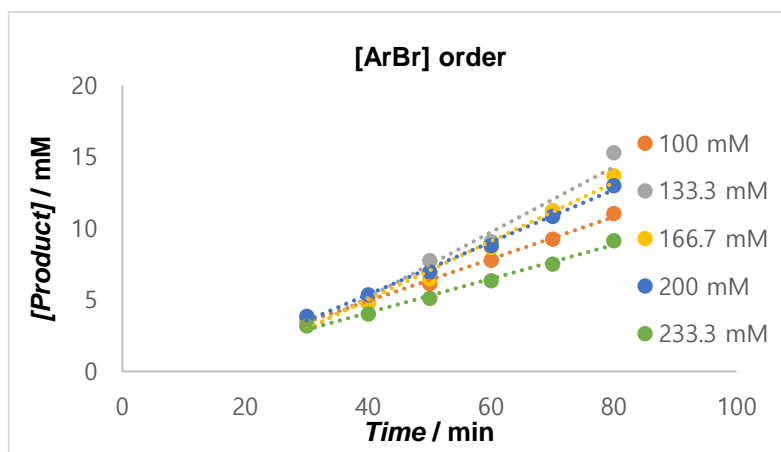

**Figure S5.** Initial rates of the C–H arylation with varying concentrations of 3-bromotoluene

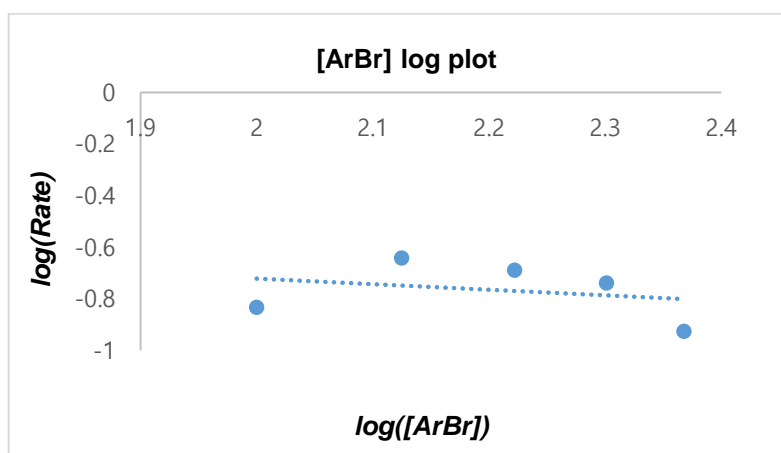

**Figure S6.** Log plot of initial rates with varying 3-bromotoluene

### 4.2.3. Competition Experiments

#### Set A: 3-bromotoluene (**2a**) vs. 4-bromobenzotrifluoride (**2q**)

The reaction was conducted by modifying the general procedure. Inside an argon-filled glove box, a 10 mL Schlenk tube was charged with cesium fluoride (2.5 equiv), cesium pivalate (0.80 equiv), palladium acetate (5.0 mol%), pivalic acid (0.30 equiv), *n*-tetrabutylammonium bromide (0.80 equiv), followed by benzene (1.5 mL), **2a** (0.20 mmol, 1.0 equiv), and **2q** (0.20 mmol, 1.0 equiv). The Schlenk tube was sealed and heated to 80 °C for 6 h. Upon completion of the reaction, the mixture was cooled to room temperature. It was analyzed by GC using dodecane as an internal standard.

#### Set B: 3-bromotoluene (**2a**) vs. 4-bromoanisole (**2g**)

The reaction was conducted according to the above procedure using **2a** (0.20 mmol, 1.0 equiv) and **2g** (0.20 mmol, 1.0 equiv) as competing substrates. Fluorobenzene (1.5 mL) was used instead of benzene.

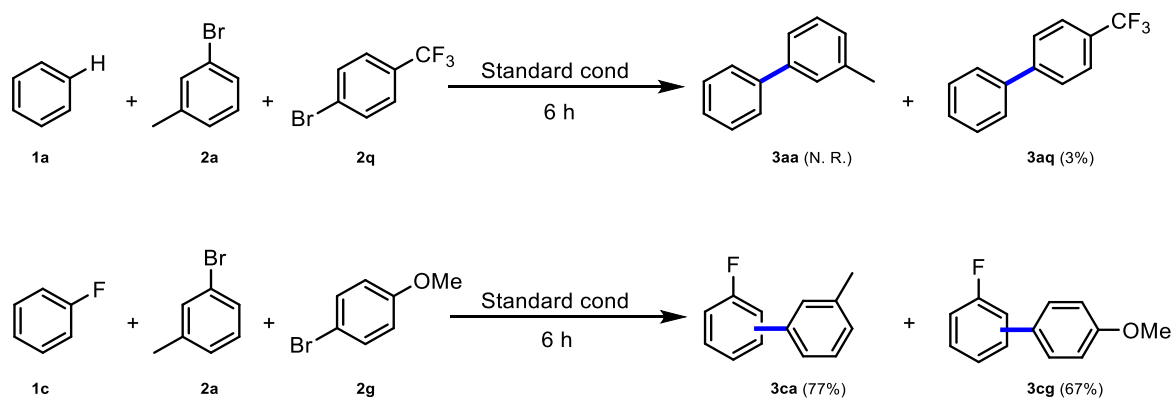

**Scheme S2.** Competition Experiments

## 5. Gram-scale reaction

### General procedure for arylation reaction with ammonium salt

A Schlenk tube (500 mL) was charged with 3-bromotoluene (10 mmol), cesium fluoride (2.5 equiv), cesium pivalate (0.80 equiv), palladium acetate (5.0 mol%), pivalic acid (30 mol%), tetra-*n*-butylammonium bromide (0.80 equiv), and benzene (75 mL) in an argon-filled glove box. The reaction vessel was placed in an oil bath and heated to 80 °C. After 18 h, the reaction was cooled to room temperature, and the crude reaction mixture was concentrated using a rotary evaporator. The residue was purified by column chromatography to afford the desired product.

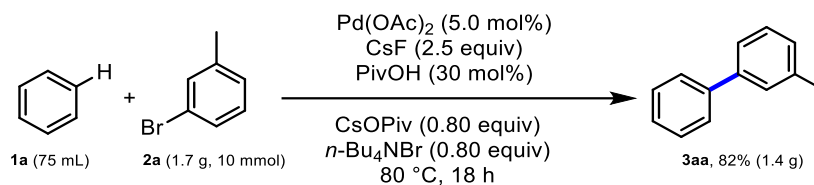

**Scheme S3.** Gram-scale reaction of direct C–H arylation

## 6. Synthesis of compounds used in homo/heterogeneity studies

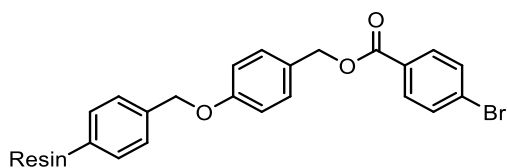

### Resin-ArBr (4)

The synthesis was conducted by modifying a procedure used for an analogous complex.<sup>[2]</sup> A 50 mL Schlenk tube was charged with Wang resin (1.75 g, 2.0 mmol), 4-bromobenzoic acid (1.21 g, 3.0 equiv), *N, N'*-diisopropylcarbodiimide (0.93 mL, 3.0 equiv), and 4-dimethylaminopyridine (122.2 mg, 0.50 equiv) in CH<sub>2</sub>Cl<sub>2</sub> (20 mL). The reaction was conducted under room temperature for 18 h. After the reaction, the crude mixture was filtered and washed by CH<sub>3</sub>OH, THF, and CH<sub>2</sub>Cl<sub>2</sub>. The resulting pale yellow solid was dried under vacuum (1.90 g, 90%). The purity of the complex was confirmed by elemental analysis. Anal. Found. for **4** (based on Wang resin): C, 80.70; H, 6.43; O, 4.91.

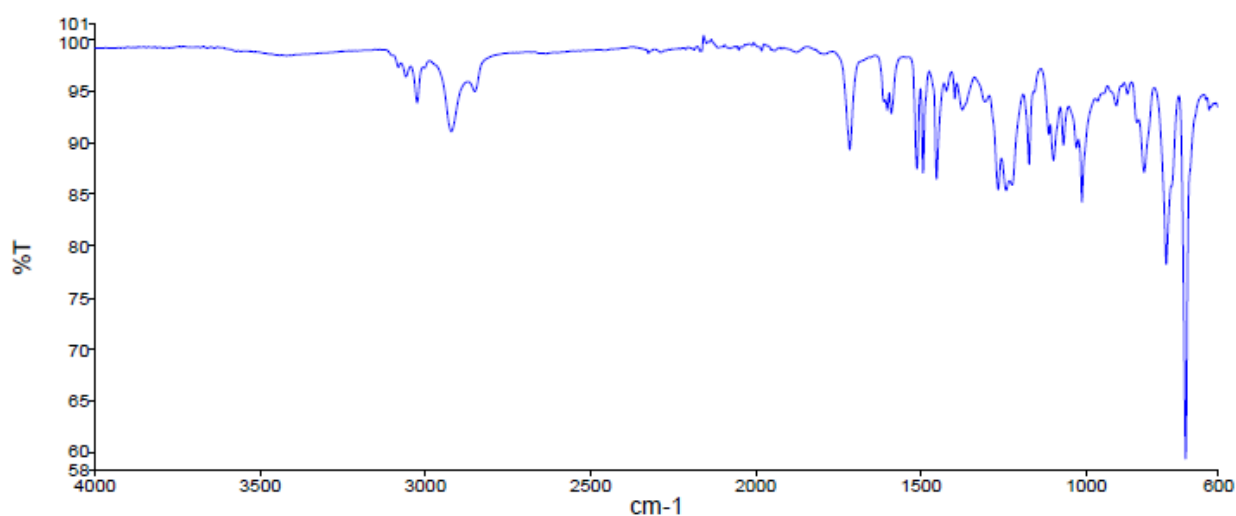

Figure S7. IR spectrum of **4**

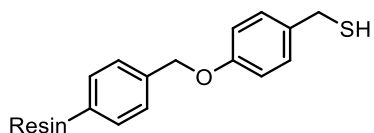

### Resin-SH (5)

Synthesis was conducted by modifying a procedure used for an analogous complex.<sup>[3]</sup> A 50 mL Schlenk tube was charged with brominated Wang resin (625.0 mg, 0.50



mmol), and thiourea (380.6 mg, 10 equiv) in 1,4-dioxane/ethanol (5.0 mL/5.0 mL), and stirred under reflux for 27 h. Piperidine (0.49 mL, 10 equiv) was added and further stirring was done for 5 h. After the reaction, the crude mixture was diluted by adding H<sub>2</sub>O and filtered, washed by H<sub>2</sub>O, acetone, and CH<sub>3</sub>OH. The resulting yellow solid was dried under vacuum (610.8 mg, >99%). The purity of the complex was confirmed by elemental analysis. Anal. Found. for **5** (based on Wang brominated resin): C, 84.79; H, 7.49; O, 1.59; N, 2.08; S, 2.41.

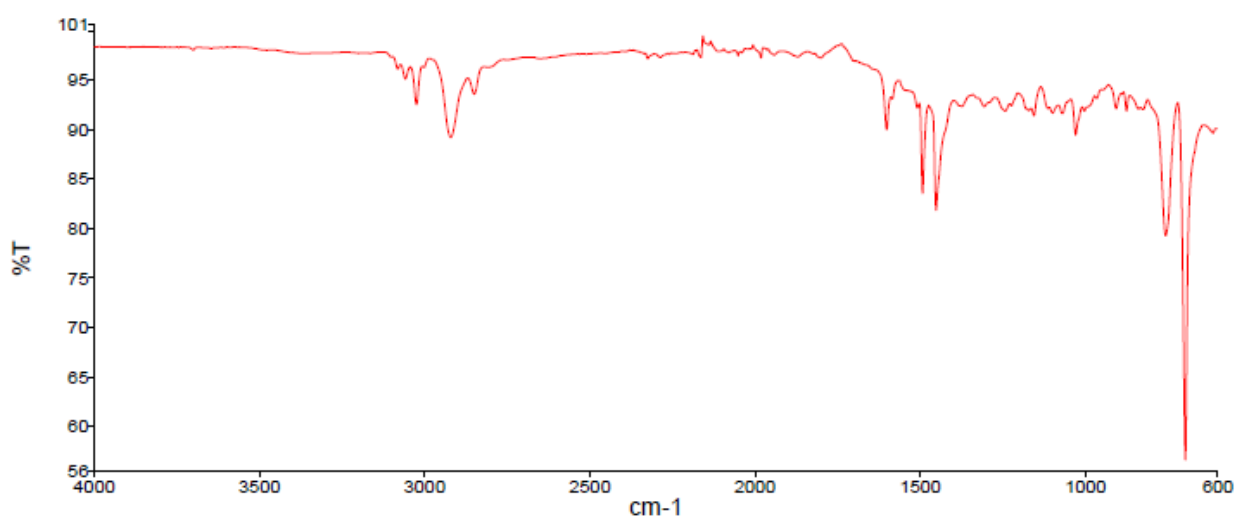

**Figure S8.** IR spectrum of **5**

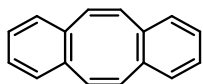

**Dibenzo[a,e]cyclooctatetraene (7)**

The compound was synthesized by 3 steps referring to the literature.<sup>[4]</sup>

## 7. Characterization of products

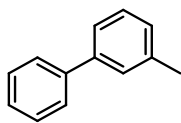

### 3-methylbiphenyl (3aa)

Colorless oil. The compound was identified by spectral comparison with literature data.<sup>[5]</sup>

<sup>1</sup>H NMR (400 MHz, CDCl<sub>3</sub>) δ 7.60 (d, *J* = 7.6 Hz, 2H), 7.46 – 7.40 (m, 4H), 7.34 (t, *J* = 7.4 Hz, 2H), 7.18 (d, *J* = 7.4 Hz, 1H), 2.43 (s, 3H).

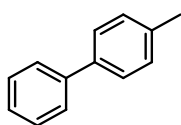

### 4-methylbiphenyl (3ab)

White solid. The compound was identified by spectral comparison with literature data.<sup>[6]</sup>

<sup>1</sup>H NMR (499 MHz, CDCl<sub>3</sub>) δ 7.50 (d, *J* = 7.6 Hz, 2H), 7.41 (d, *J* = 7.5 Hz, 2H), 7.38 – 7.32 (m, 2H), 7.27 – 7.22 (m, 1H), 7.19 – 7.14 (m, 2H), 2.31 (s, 3H).

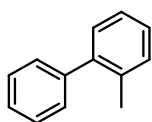

### 2-methylbiphenyl (3ac)

Colorless oil. The compound was identified by spectral comparison with literature data.<sup>[7]</sup>

<sup>1</sup>H NMR (499 MHz, CDCl<sub>3</sub>) δ 7.43 – 7.39 (m, 2H), 7.35 – 7.32 (m, 3H), 7.28 – 7.27 (m, 2H), 7.25 – 7.23 (m, 2H), 2.28 (s, 3H).

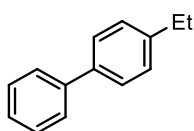

### 4-ethylbiphenyl (3ad)

White solid. The compound was identified by spectral comparison with literature data.<sup>[8]</sup>

<sup>1</sup>H NMR (400 MHz, CDCl<sub>3</sub>) δ 7.62 (d, *J* = 8.1 Hz, 2H), 7.56 (d, *J* = 7.9 Hz, 2H), 7.46 (t, *J* = 7.6 Hz, 2H), 7.35 (t, *J* = 7.4 Hz, 1H), 7.31 (d, *J* = 7.9 Hz, 2H), 2.73 (q, *J* = 7.6 Hz,

2H), 1.31 (t,  $J = 7.6$  Hz, 3H).

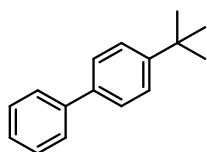

#### 4-tert-butylbiphenyl (3ae)

Colorless oil. The compound was identified by spectral comparison with literature data.<sup>[9]</sup>

$^1\text{H}$  NMR (400 MHz,  $\text{CDCl}_3$ )  $\delta$  7.62 – 7.52 (m, 4H), 7.49 – 7.40 (m, 4H), 7.36 – 7.31 (m, 1H), 1.37 (s, 9H).

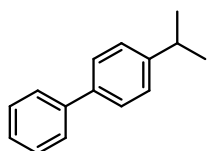

#### 4-isopropylbiphenyl (3af)

Colorless oil. The compound was identified by spectral comparison with literature data.<sup>[10]</sup>

$^1\text{H}$  NMR (400 MHz,  $\text{CDCl}_3$ )  $\delta$  7.57 (d,  $J = 5.8$  Hz, 2H), 7.52 (d,  $J = 4.8$  Hz, 2H), 7.45 – 7.38 (m, 2H), 7.35 – 7.27 (m, 3H), 3.01 – 2.89 (m, 1H), 1.30 – 1.27 (m, 6H).

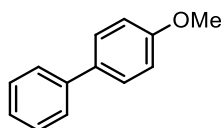

#### 4-methoxybiphenyl (3ag)

White solid. The compound was identified by spectral comparison with literature data.<sup>[5]</sup>

$^1\text{H}$  NMR (499 MHz,  $\text{CDCl}_3$ )  $\delta$  7.58 – 7.52 (m, 4H), 7.42 (t,  $J = 7.7$  Hz, 2H), 7.31 (t,  $J = 7.4$  Hz, 1H), 6.99 (d,  $J = 8.7$  Hz, 2H), 3.86 (s, 3H).

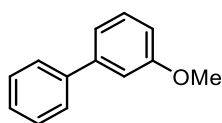

#### 3-methoxybiphenyl (3ah)

White solid. The compound was identified by spectral comparison with literature data.<sup>[5]</sup>

$^1\text{H}$  NMR (400 MHz,  $\text{CDCl}_3$ )  $\delta$  7.61 – 7.58 (m, 2H), 7.44 (t,  $J = 7.5$  Hz, 2H), 7.39 – 7.33 (m, 2H), 7.21 – 7.17 (m, 1H), 7.14 – 7.12 (m, 1H), 6.90 (dd,  $J = 7.8, 2.1$  Hz, 1H), 3.87 (s, 3H).

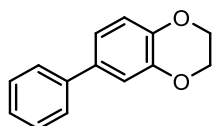

### 6-phenyl-2,3-dihydrobenzo[*b*][1,4]dioxine (3ai)

White solid. The compound was identified by spectral comparison with literature data.<sup>[11]</sup>

$^1\text{H}$  NMR (499 MHz,  $\text{CDCl}_3$ )  $\delta$  7.55 – 7.52 (m, 2H), 7.41 (t,  $J = 7.7$  Hz, 2H), 7.30 (t,  $J = 6.9$  Hz, 1H), 7.12 (d,  $J = 2.1$  Hz, 1H), 7.09 (dd,  $J = 8.3, 2.2$  Hz, 1H), 6.93 (d,  $J = 8.3$  Hz, 1H), 4.30 (s, 4H).

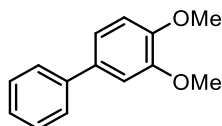

### 3,4-dimethoxybiphenyl (3aj)

White solid. The compound was identified by spectral comparison with literature data.<sup>[12]</sup>

$^1\text{H}$  NMR (499 MHz,  $\text{CDCl}_3$ )  $\delta$  7.57 (d,  $J = 7.3$  Hz, 2H), 7.43 (t,  $J = 7.7$  Hz, 2H), 7.33 (t,  $J = 7.3$  Hz, 1H), 7.16 (dd,  $J = 8.2, 1.9$  Hz, 1H), 7.12 (d,  $J = 1.8$  Hz, 1H), 6.96 (d,  $J = 8.3$  Hz, 1H), 3.96 (s, 3H), 3.93 (s, 3H).

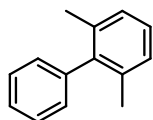

### 2,6-dimethylbiphenyl (3ak)

Colorless oil. The compound was identified by spectral comparison with literature data.<sup>[13]</sup>  $^1\text{H}$  NMR (499 MHz,  $\text{CDCl}_3$ )  $\delta$  7.43 (t,  $J = 7.5$  Hz, 2H), 7.34 (t,  $J = 7.4$  Hz, 1H), 7.18 – 7.11 (m, 5H), 2.04 (s, 6H).

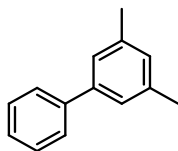

### 3,5-dimethylbiphenyl (3al)

Colorless oil. The compound was identified by spectral comparison with literature data.<sup>[14]</sup>

<sup>1</sup>H NMR (400 MHz, CDCl<sub>3</sub>) δ 7.58 (d, *J* = 8.2 Hz, 2H), 7.43 (t, *J* = 7.5 Hz, 2H), 7.33 (t, *J* = 7.3 Hz, 1H), 7.22 (s, 2H), 7.01 (s, 1H), 2.39 (s, 6H).

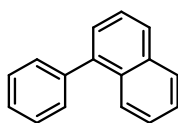

### 1-phenylnaphthalene (3am)

Colorless oil. The compound was identified by spectral comparison with literature data.<sup>[5]</sup>

<sup>1</sup>H NMR (400 MHz, CDCl<sub>3</sub>) δ 7.91 (d, *J* = 8.3 Hz, 2H), 7.87 (d, *J* = 8.2 Hz, 1H), 7.54 (d, *J* = 8.0 Hz, 1H), 7.49 (t, *J* = 5.9 Hz, 5H), 7.44 (d, *J* = 1.3 Hz, 3H).

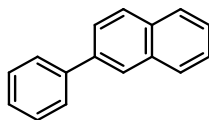

### 2-phenylnaphthalene (3an)

White solid. The compound was identified by spectral comparison with literature data.<sup>[5]</sup>

<sup>1</sup>H NMR (499 MHz, CDCl<sub>3</sub>) δ 8.06 (s, 1H), 7.95 – 7.86 (m, 3H), 7.79 – 7.72 (m, 3H), 7.54 – 7.49 (m, 4H), 7.41 – 7.38 (m, 1H).

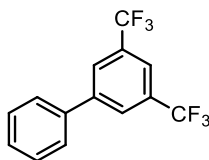

### 3,5-bis(trifluoromethyl)-biphenyl (3ao)

Colorless oil. The compound was identified by spectral comparison with literature data.<sup>[5]</sup>

<sup>1</sup>H NMR (400 MHz, CDCl<sub>3</sub>) δ 8.02 (s, 2H), 7.86 (s, 1H), 7.62 (d, *J* = 7.1 Hz, 2H), 7.53

– 7.44 (m, 3H).

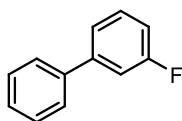

### 3-fluorobiphenyl (3ap)

Colorless oil. The compound was identified by spectral comparison with literature data.<sup>[15]</sup>

<sup>1</sup>H NMR (499 MHz, CDCl<sub>3</sub>) δ 7.55 – 7.48 (m, 2H), 7.38 (t, *J* = 7.6 Hz, 2H), 7.34 – 7.29 (m, 3H), 7.22 (d, *J* = 10.2, 1.5 Hz, 1H), 7.00 – 6.94 (m, 1H).

### PdBr<sub>4</sub>(*n*-Bu<sub>4</sub>N)<sub>2</sub>

Red solid.

<sup>1</sup>H NMR (400 MHz, CDCl<sub>3</sub>) δ 3.53 – 3.43 (m, 8H), 1.82 – 1.71 (m, 8H), 1.60 – 1.48 (m, 8H), 1.03 (t, *J* = 7.3 Hz, 12H); <sup>13</sup>C NMR (400 MHz, CDCl<sub>3</sub>) δ 59.43, 24.54, 20.04, 14.01.

The purity of the complex was confirmed by elemental analysis. Anal. Calcd. for C<sub>32</sub>H<sub>72</sub>Br<sub>4</sub>N<sub>2</sub>Pd: C, 42.19; H, 7.97; Br, 35.08; N, 3.08; Found: C, 42.15; H, 8.08; N, 3.09.

The yields and selectivities of arene substrate scopes were determined by GC using dodecane as an internal standard.

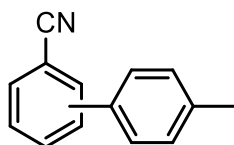

### Mixture of 4'-methyl-[1,1'-biphenyl]-2-carbonitrile, 4'-methyl-[1,1'-biphenyl]-3-carbonitrile, 4'-methyl-[1,1'-biphenyl]-4-carbonitrile (3bb)

Dodecane: RT=7.26 (min)

4'-methyl-[1,1'-biphenyl]-2-carbonitrile: RT=11.41 (min)

4'-methyl-[1,1'-biphenyl]-3-carbonitrile: RT=11.77 (min)

4'-methyl-[1,1'-biphenyl]-4-carbonitrile: RT=11.90 (min)

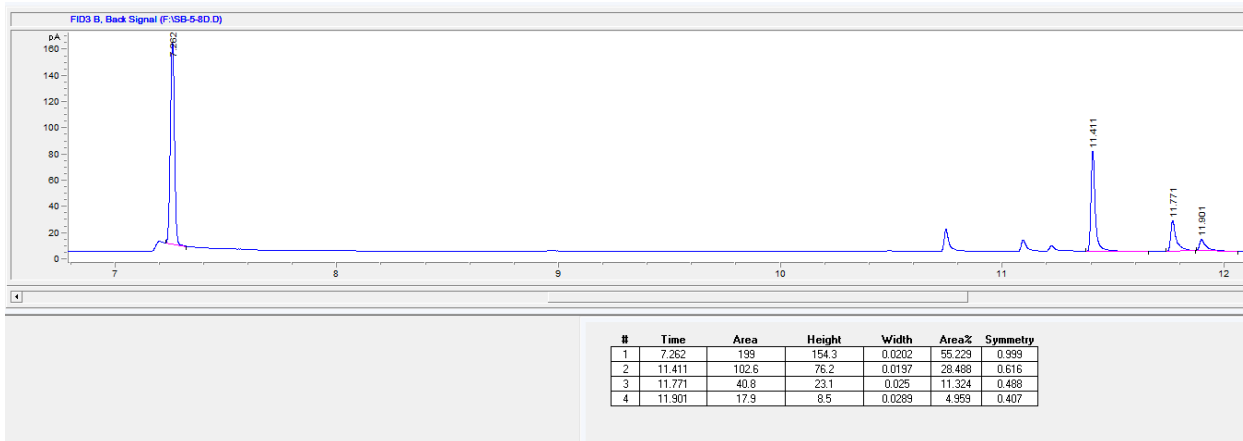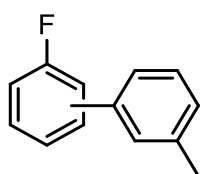

**Mixture of 2-fluoro-3'-methyl-1,1'-biphenyl, 3-fluoro-3'-methyl-1,1'-biphenyl, 4'-fluoro-3-methyl-1,1'-biphenyl (3ca)**

Dodecane: RT=7.26 (min)

2-fluoro-3'-methyl-1,1'-biphenyl: RT= 9.52 (min)

3-fluoro-3'-methyl-1,1'-biphenyl: RT= 9.60 (min)

4-fluoro-3'-methyl-1,1'-biphenyl: RT= 9.63 (min)

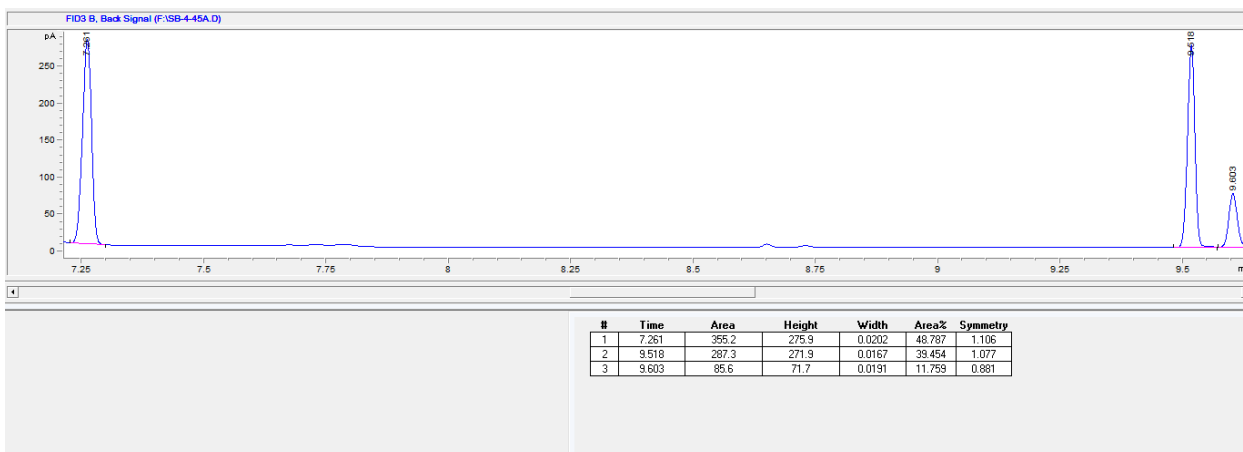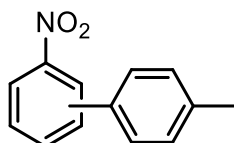

**Mixture of 4'-methyl-2-nitro-1,1'-biphenyl, 4'-methyl-3-nitro-1,1'-biphenyl, 4'-methyl-4-nitro-1,1'-biphenyl**

## methyl-4'-nitro-1,1'-biphenyl (3db)

Dodecane: RT=7.26 (min)

4'-methyl-2-nitro-1,1'-biphenyl: RT=11.67 (min)

4'-methyl-3-nitro-1,1'-biphenyl: RT=12.45 (min)

4'-methyl-4-nitro-1,1'-biphenyl: RT=12.62 (min)

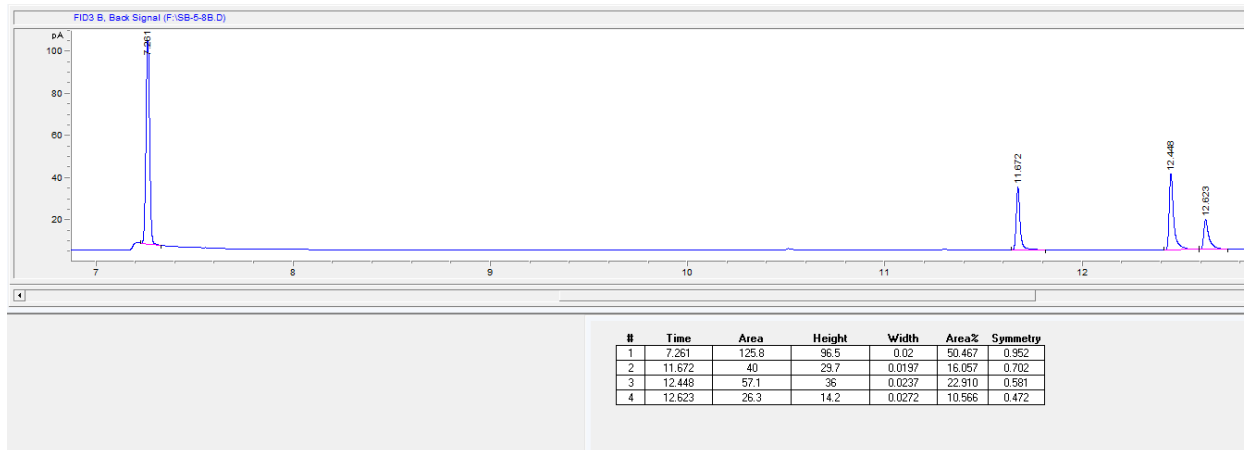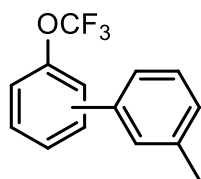

## Mixture of 3'-methyl-2-(trifluoromethoxy)-1,1'-biphenyl, 3-methyl-3'-(trifluoromethoxy)-1,1'-biphenyl, 3-methyl-4'-(trifluoromethoxy)-1,1'-biphenyl (3ea)

Dodecane: RT=7.26 (min)

3'-methyl-2-(trifluoromethoxy)-1,1'-biphenyl: 8.95 (min)

3'-methyl-3-(trifluoromethoxy)-1,1'-biphenyl: 9.56 (min)

3'-methyl-4-(trifluoromethoxy)-1,1'-biphenyl: 9.70 (min)

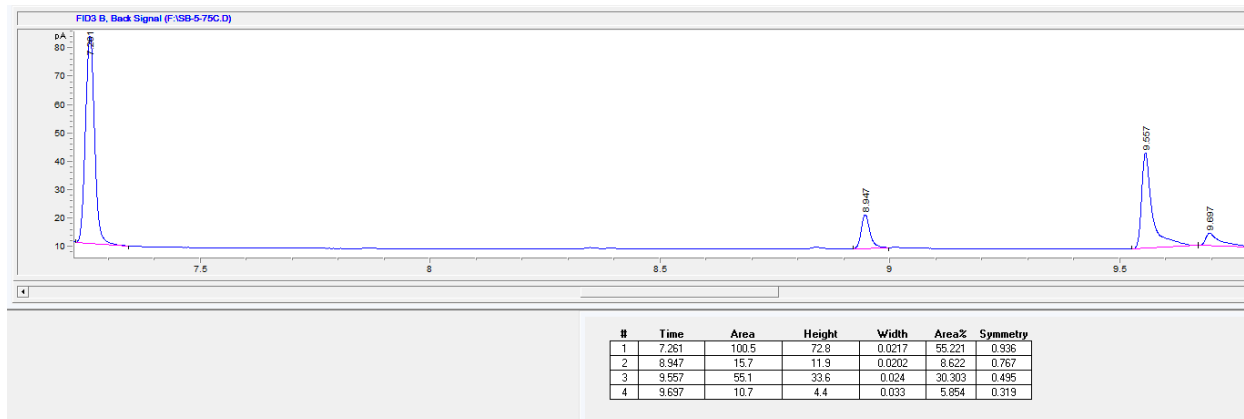



## II. References

- [1] R. H. Crabtree, *Chem. Rev.* **2012**, *112*, 1536-1554.
- [2] A. La-Venia, S. A. Testero, M. P. Mischne, E. G. Mata, *Org. Biomol. Chem.* **2012**, *10*, 2514-2517.
- [3] A. Lezzi, S. Cobianco, A. Roggero, *J. Polym. Sci., Part A.* **1994**, *32*, 1877-1883.
- [4] S. Chaffins, M. Brettreich, F. Wudl, *Synthesis* **2002**, *9*, 1191-1194.
- [5] J. Kim, S. H. Hong, *ACS Catal.* **2017**, *7*, 3336-3343.
- [6] M. J. Iglesias, A. Prieto, M. C. Nicasio, *Org. Lett.* **2012**, *14*, 4318-4321.
- [7] X. Li, T. Zhu, Z. Shao, Y. Li, H. Chang, W. Gao, Y. Zhang, W. Wei, *Tetrahedron* **2016**, *72*, 69-75.
- [8] H. Zhang, C. Wang, Z. Li, Z. Wang, *Tetrahedron Lett.* **2015**, *56*, 5371-5376.
- [9] R.-J. Tang, T. Milcent, B. Crousse, *J. Org. Chem.* **2018**, *83*, 930-938.
- [10] N. S. Mahajani, J. D. Chisholm, *J. Org. Chem.* **2018**, *83*, 4131-4139.
- [11] J. W. Fyfe, N. J. Fazakerley, A. J. Watson, *Angew. Chem. Int. Ed.* **2017**, *56*, 1249-1253.
- [12] C. L. Ciana, R. J. Phipps, J. R. Brandt, F. M. Meyer, M. J. Gaunt, *Angew. Chem.* **2011**, *123*, 478-482.
- [13] O. Y. Yuen, C. M. So, H. W. Man, F. Y. Kwong, *Chem. Eur. J.* **2016**, *22*, 6471-6476.
- [14] K. Tanimoro, M. Ueno, K. Takeda, M. Kirihata, S. Tanimori, *J. Org. Chem.* **2012**, *77*, 7844-7849.
- [15] C. Pan, J. Zhu, R. Chen, J.-T. Yu, *Org. Biomol. Chem.* **2017**, *15*, 6467-6469.

### III. NMR spectra

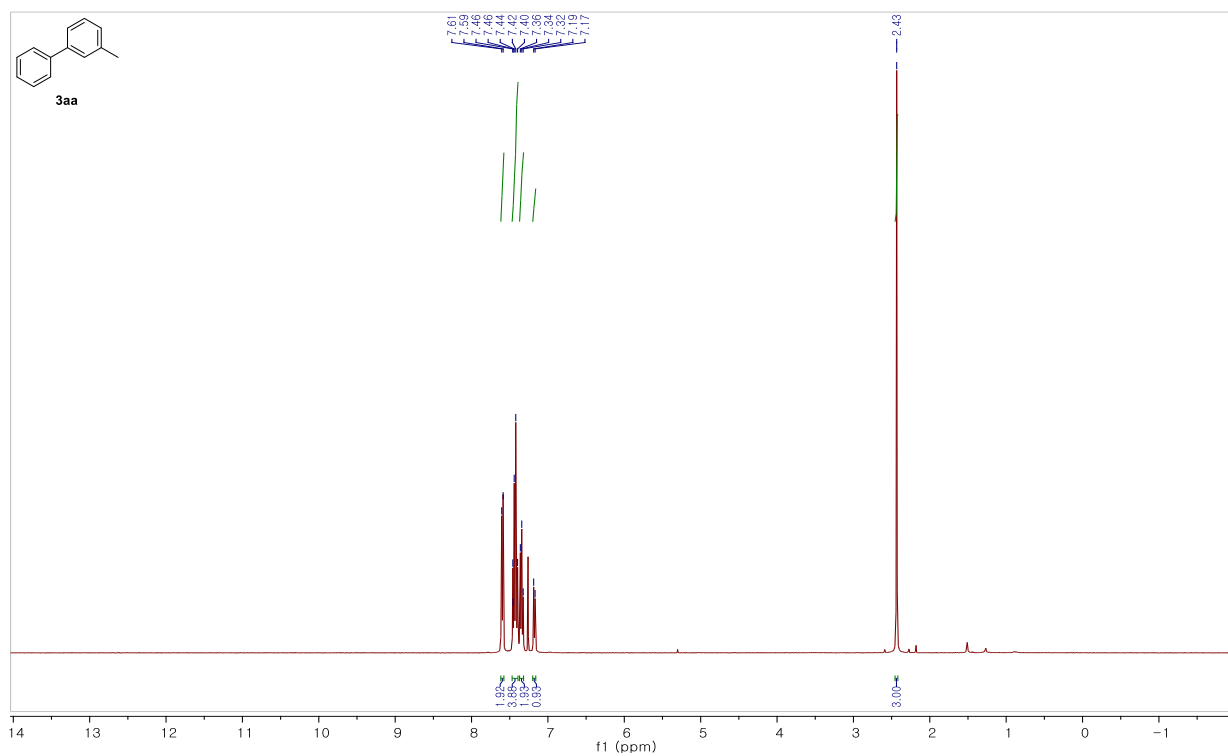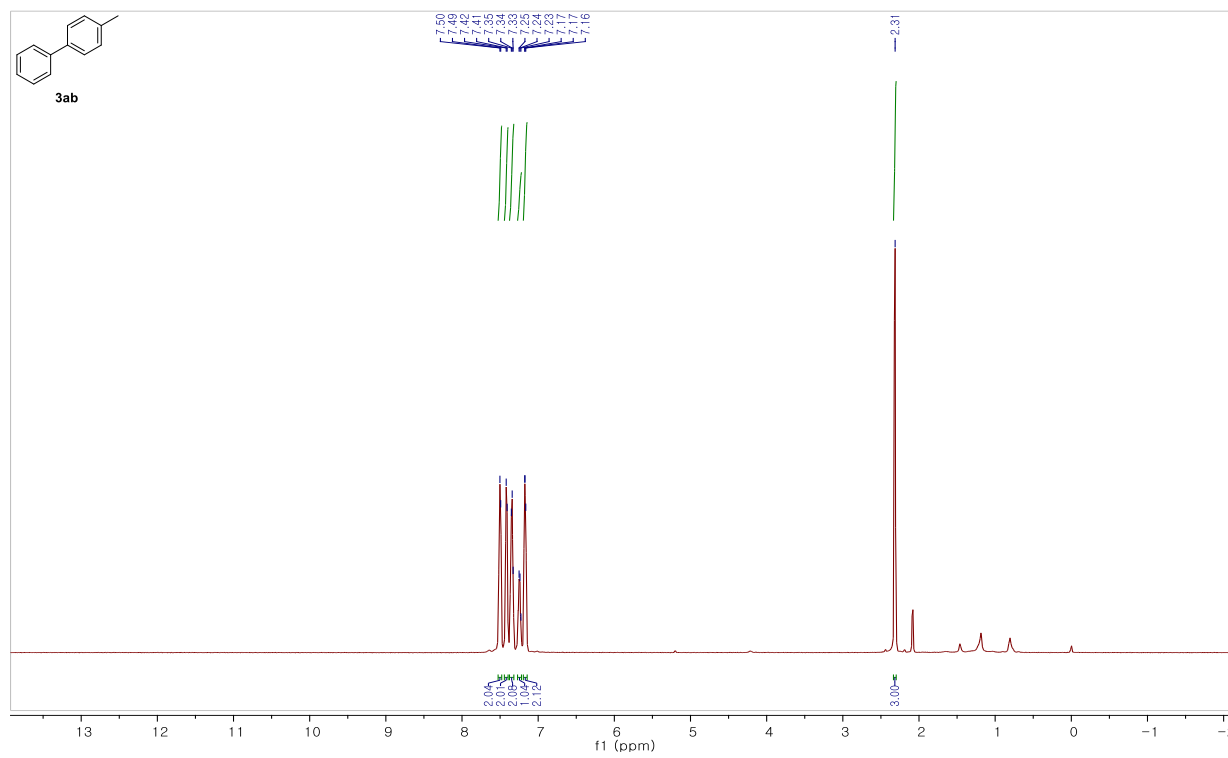

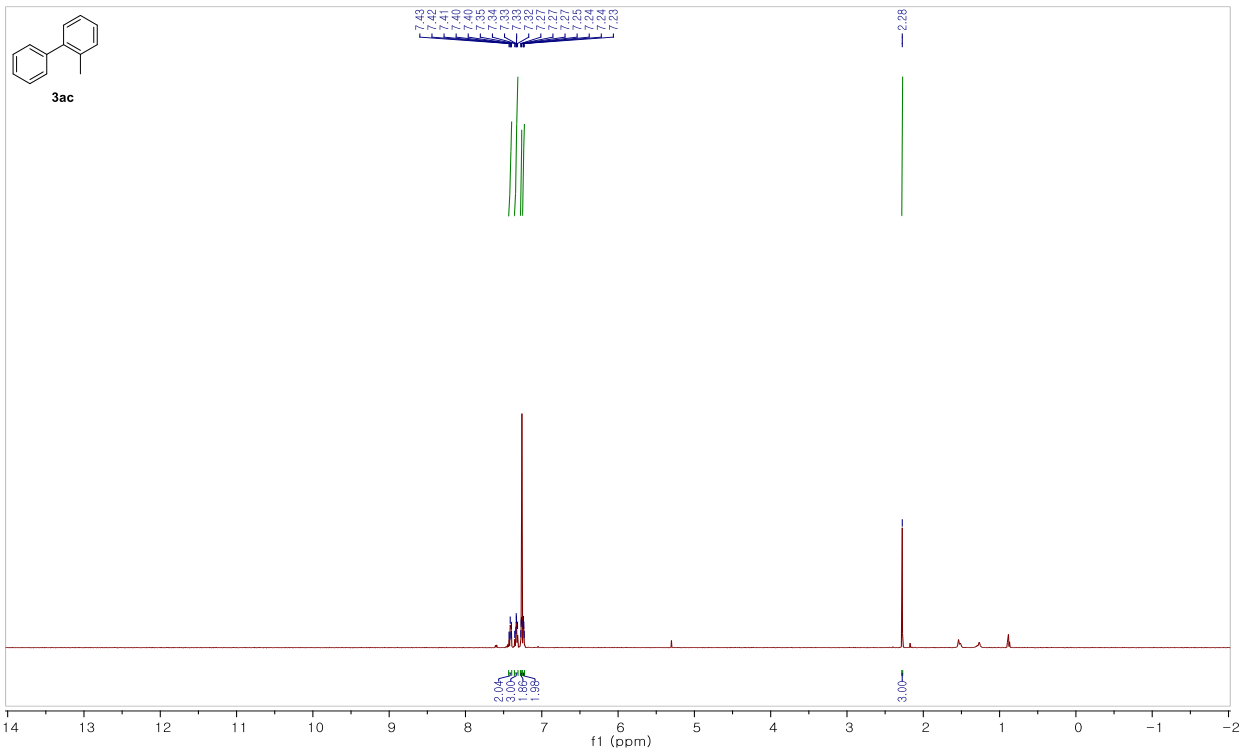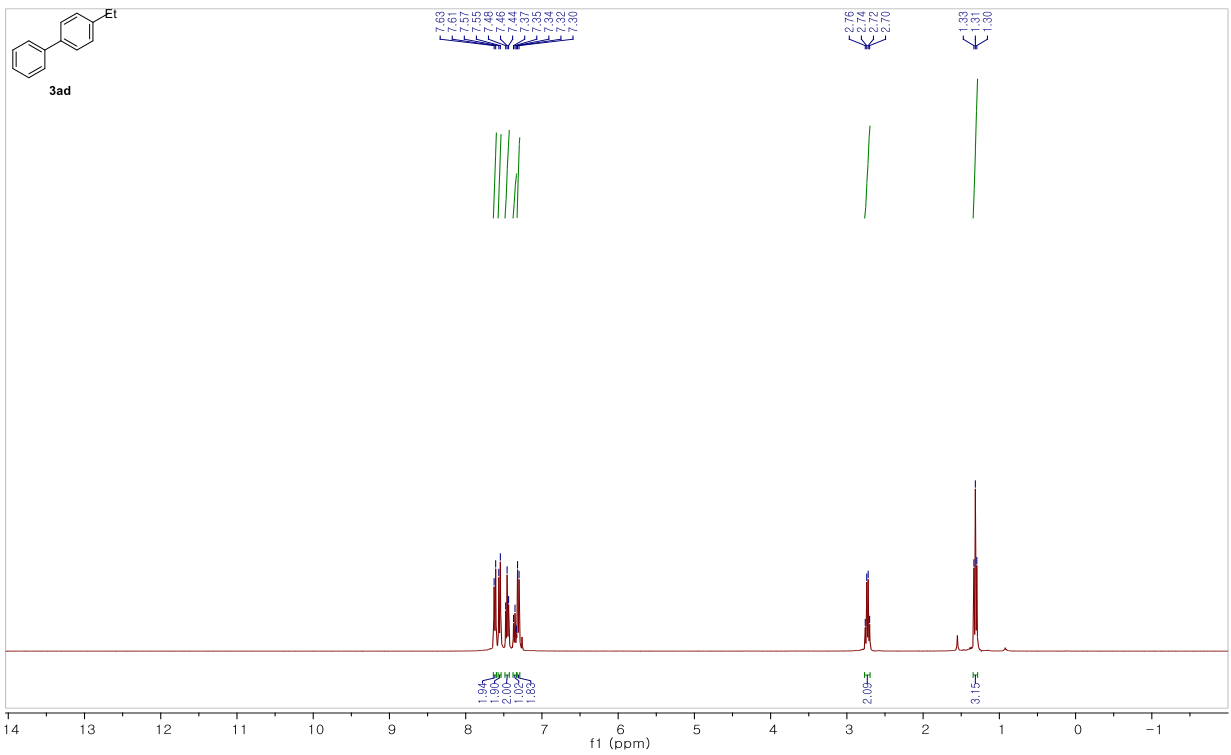

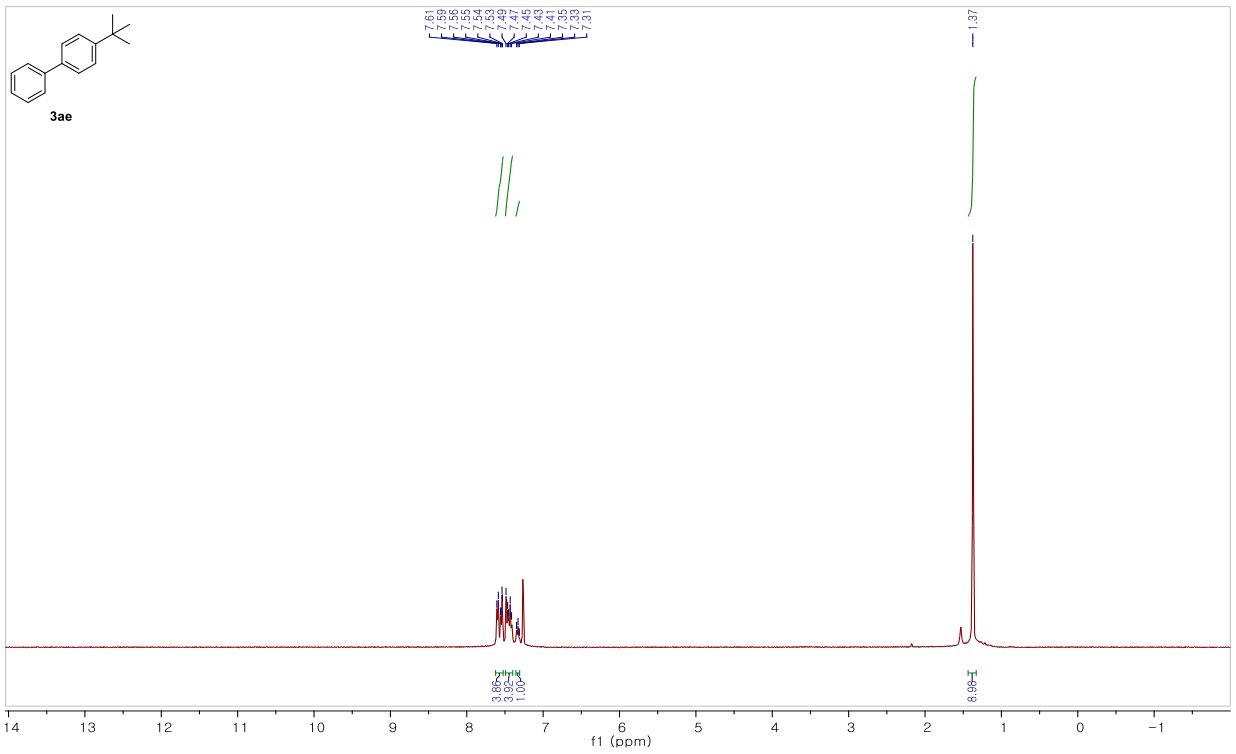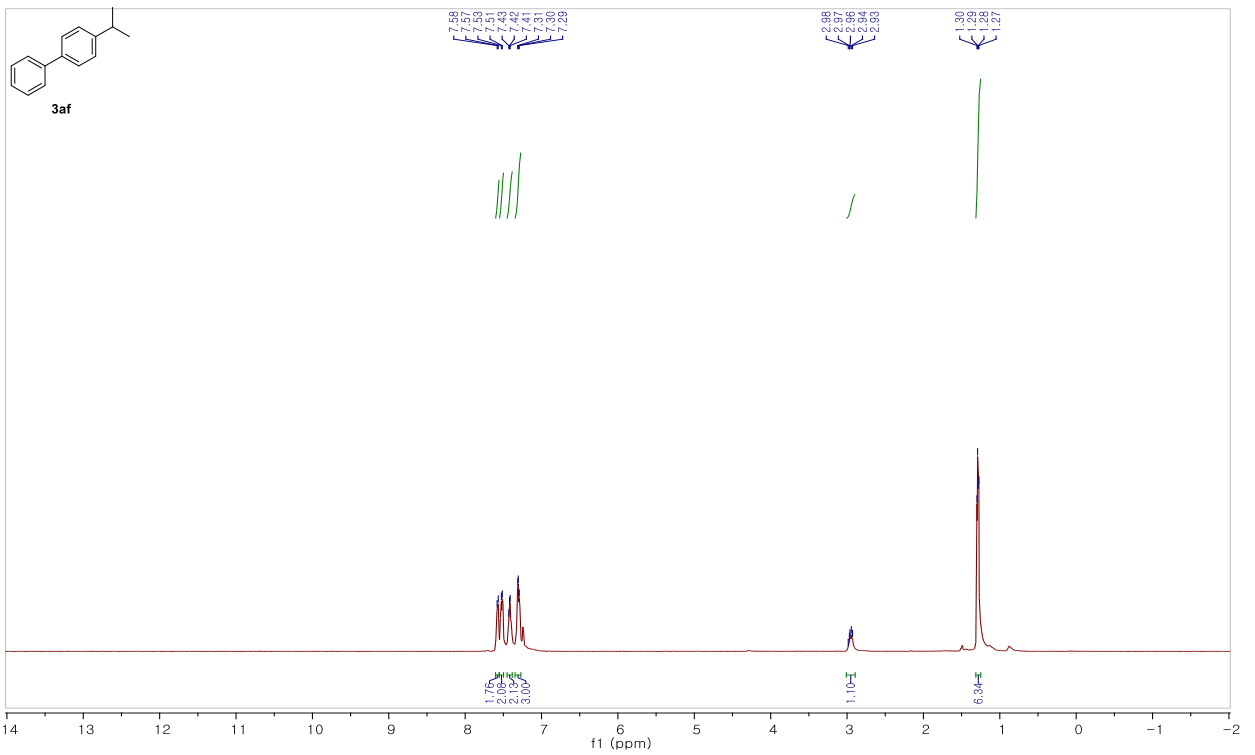

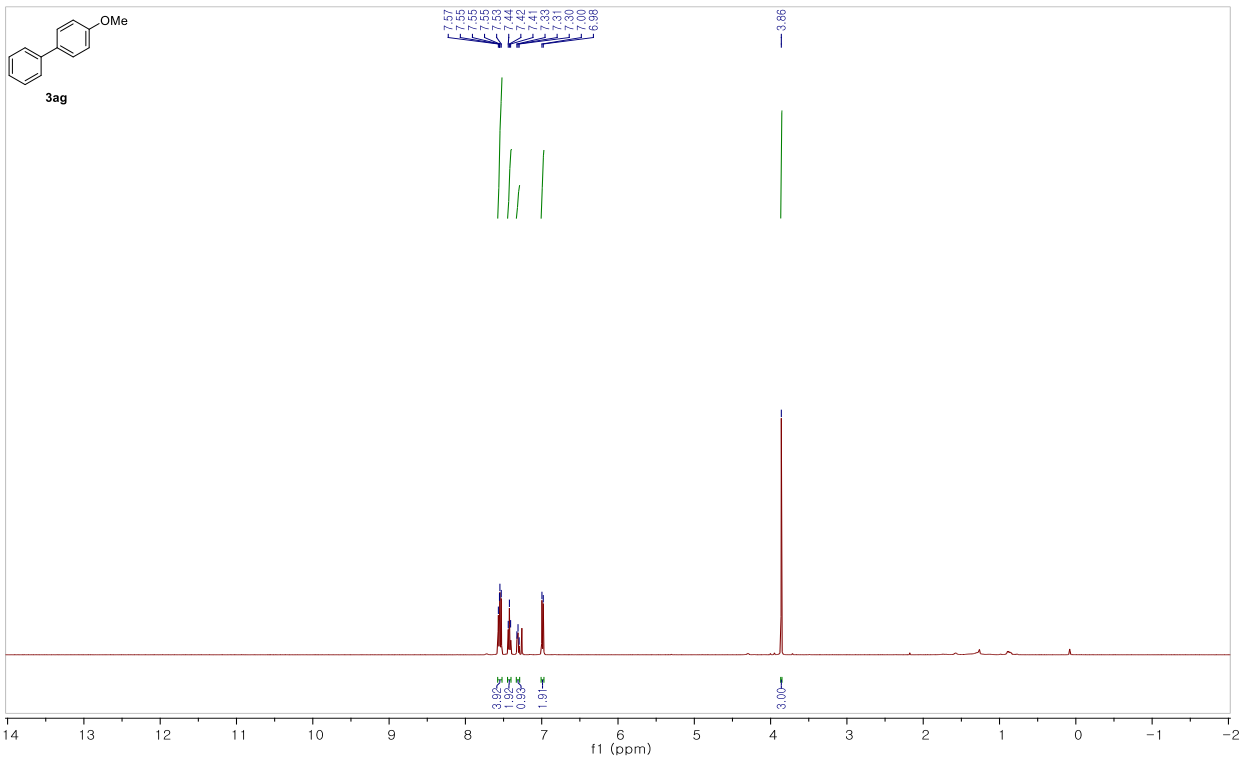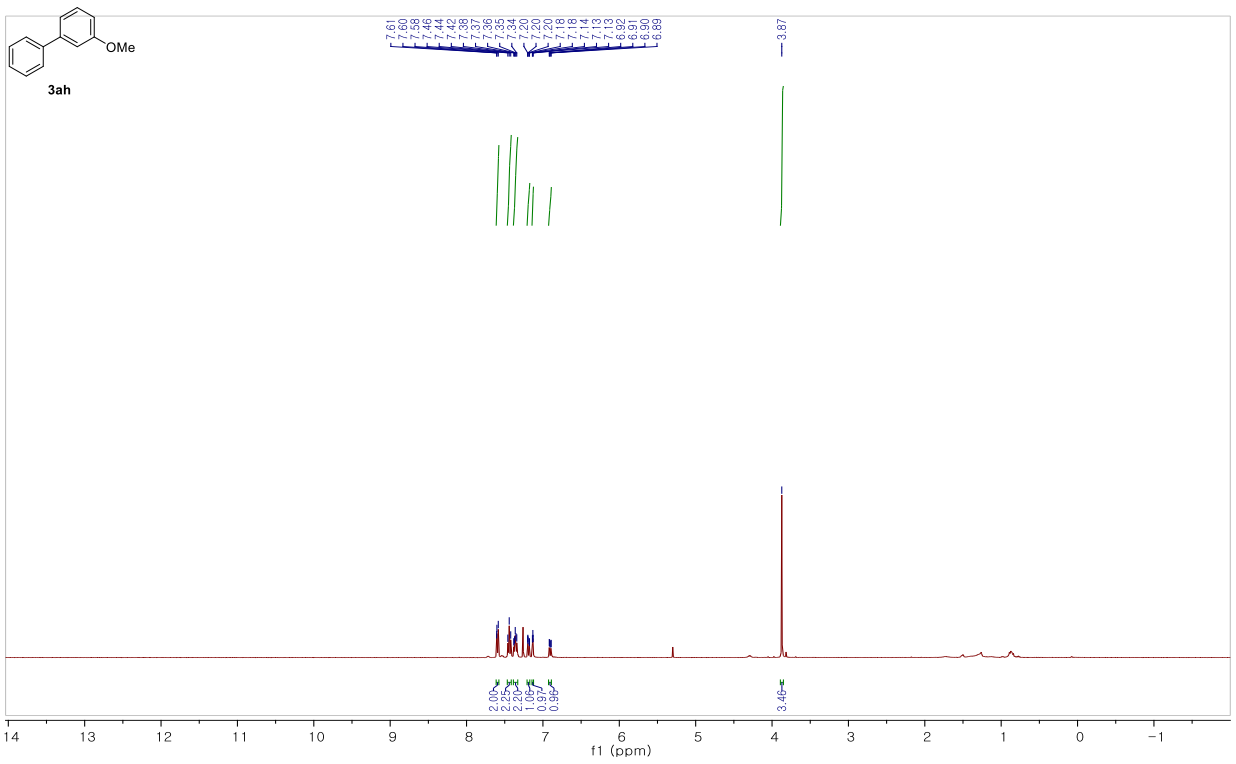

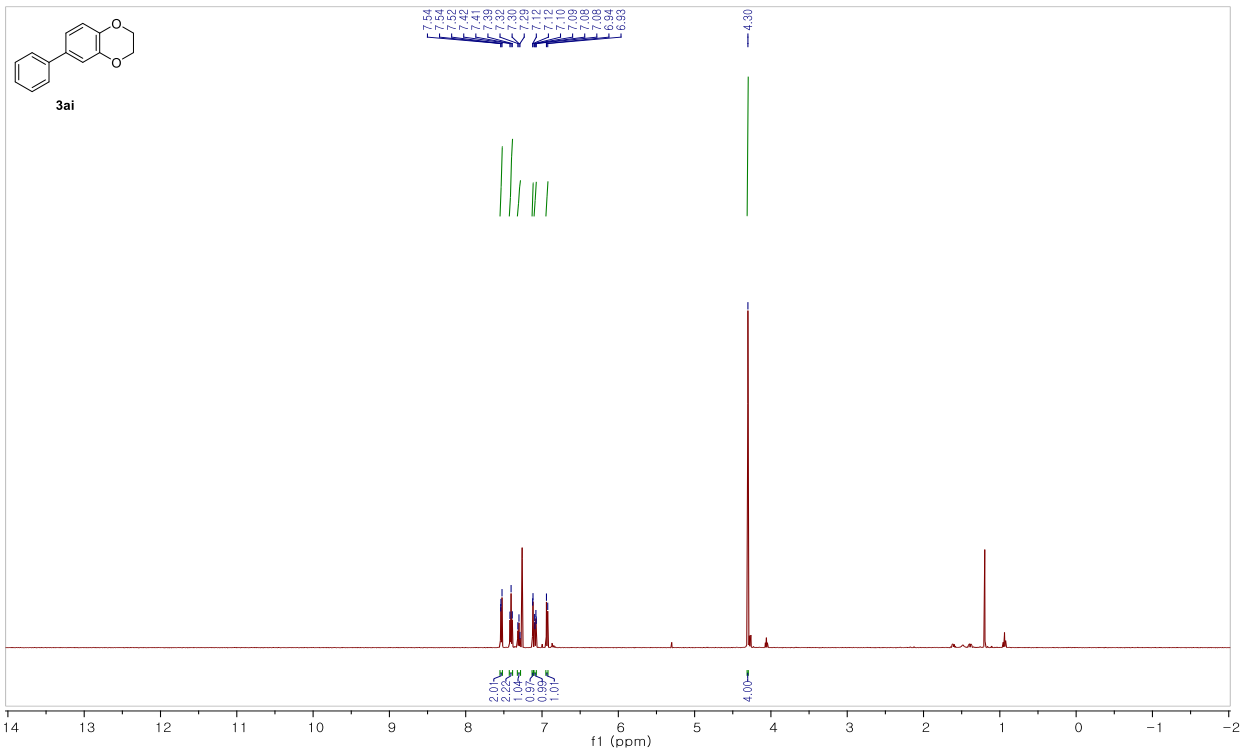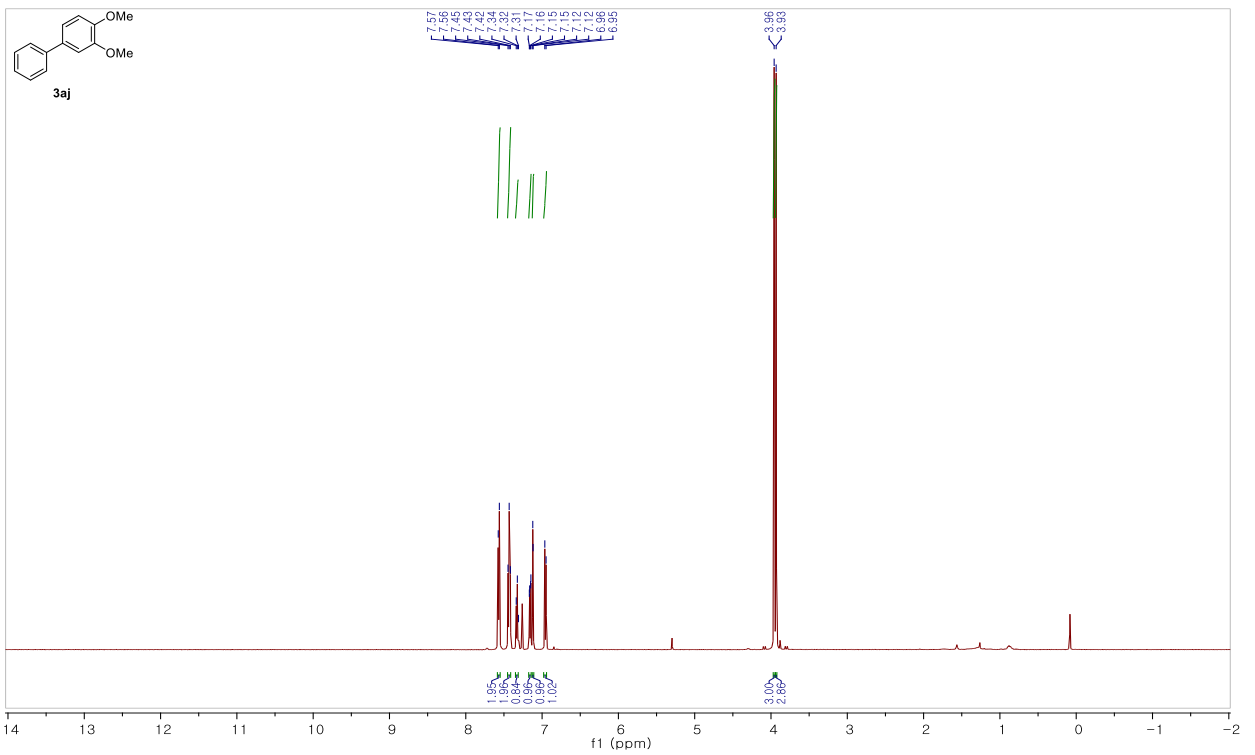

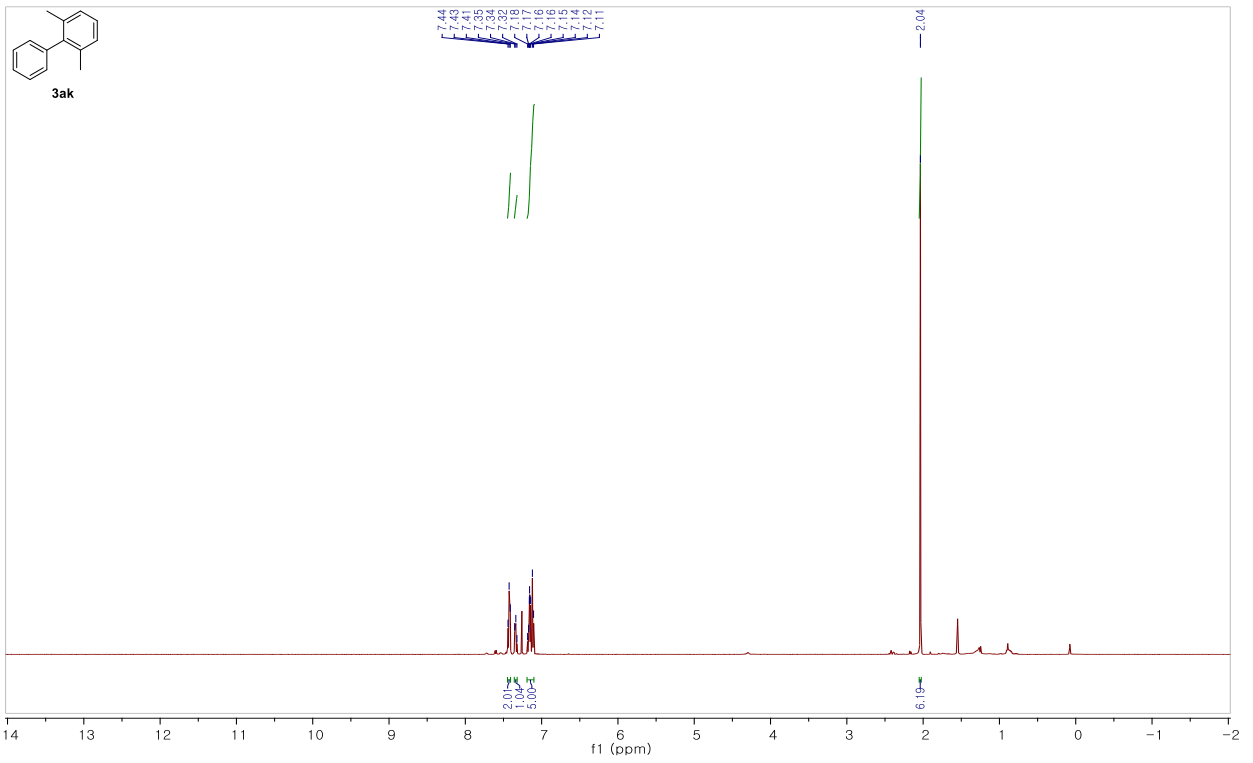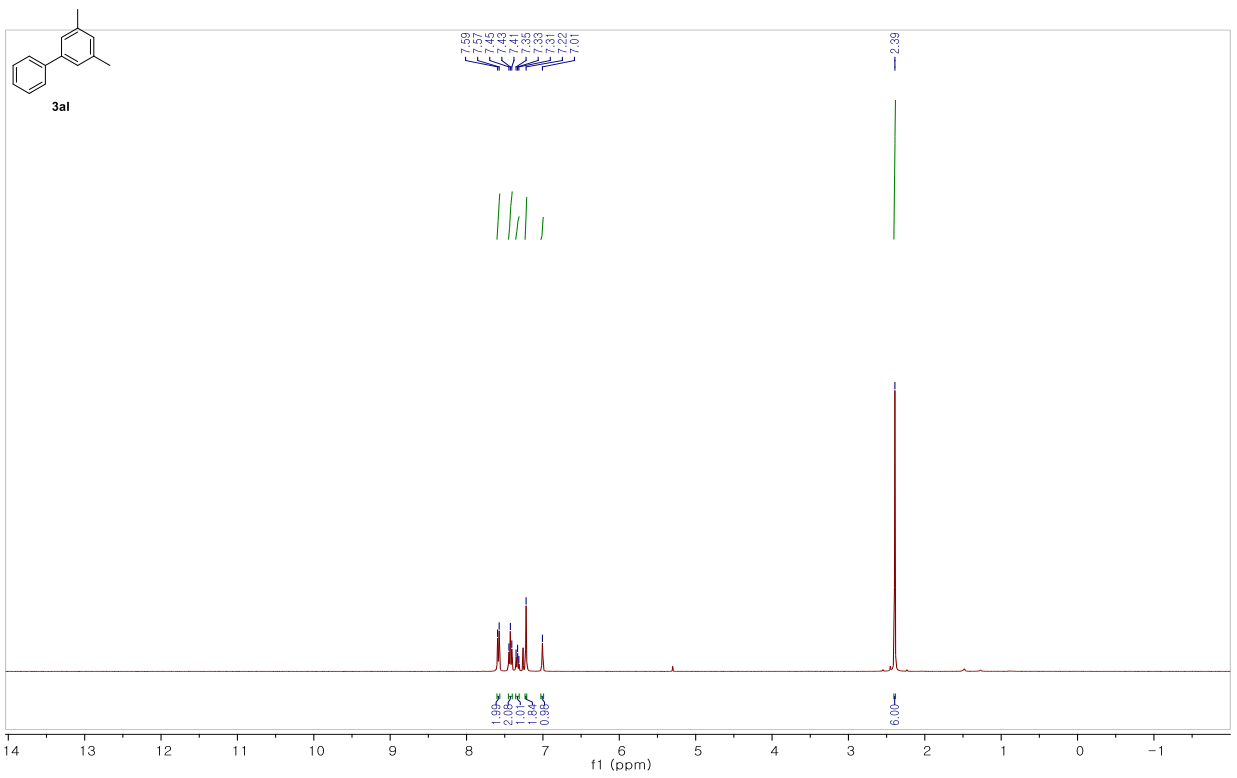

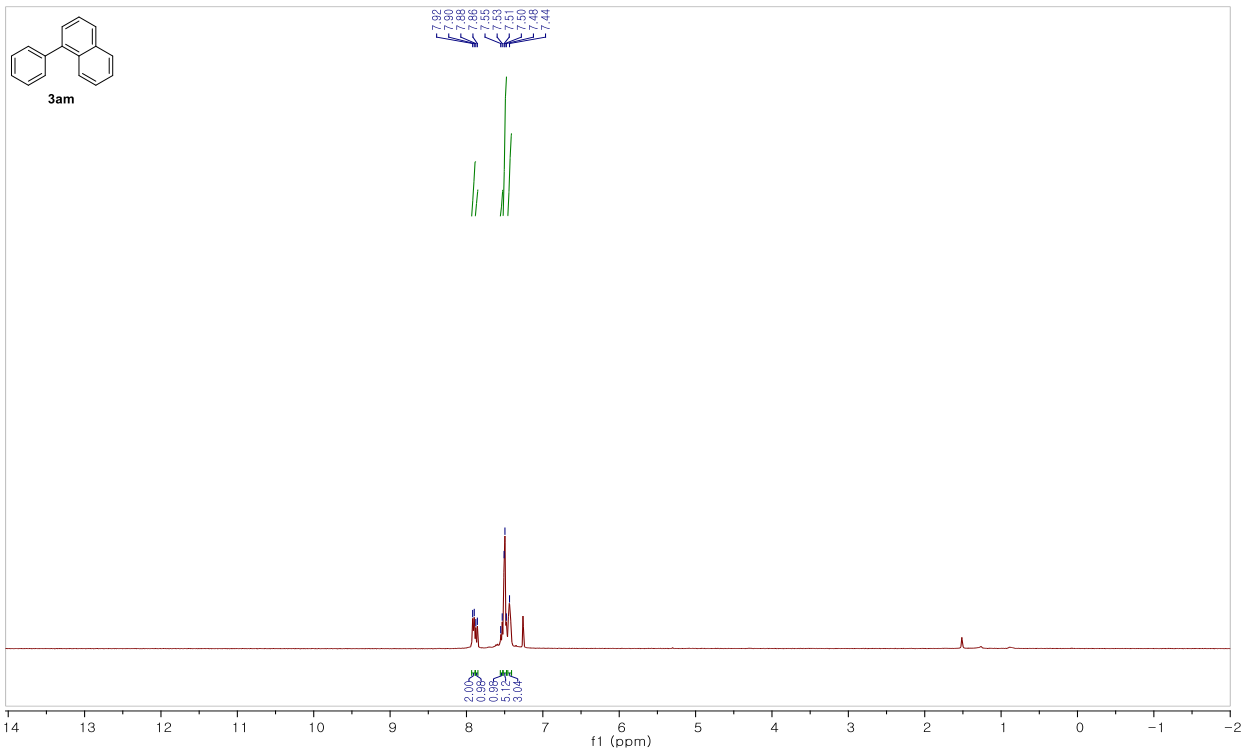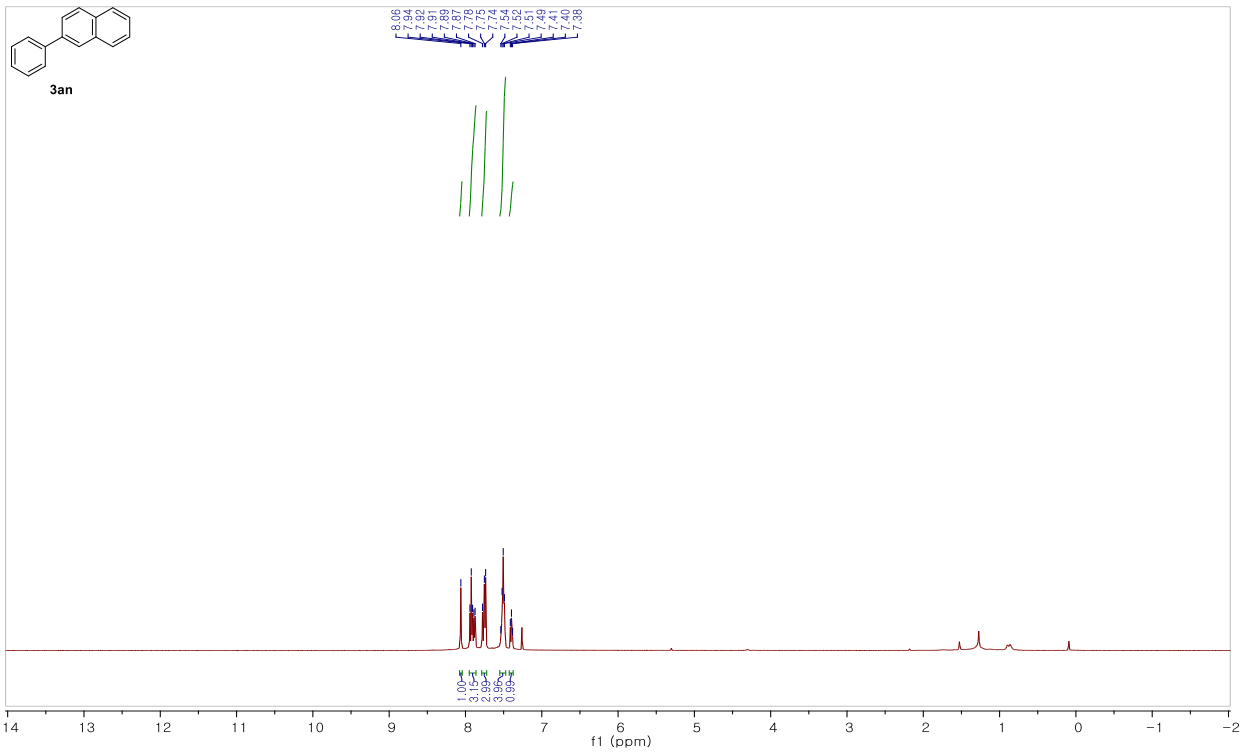



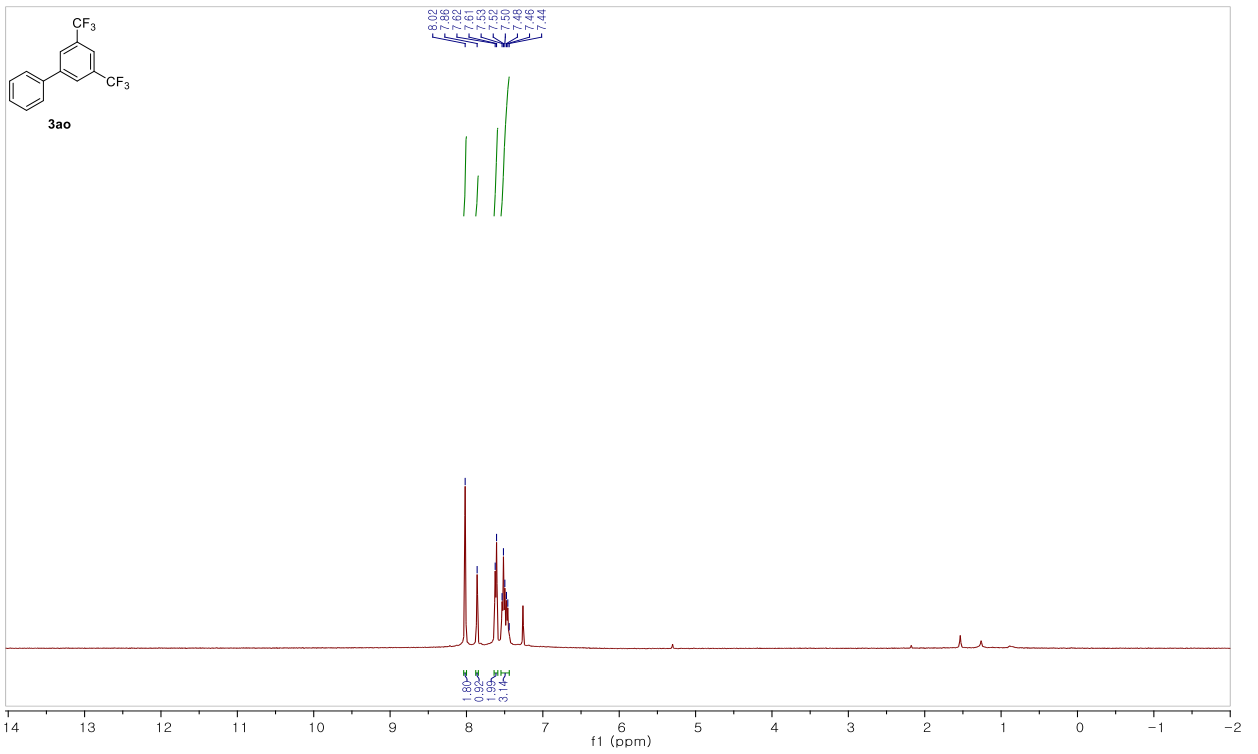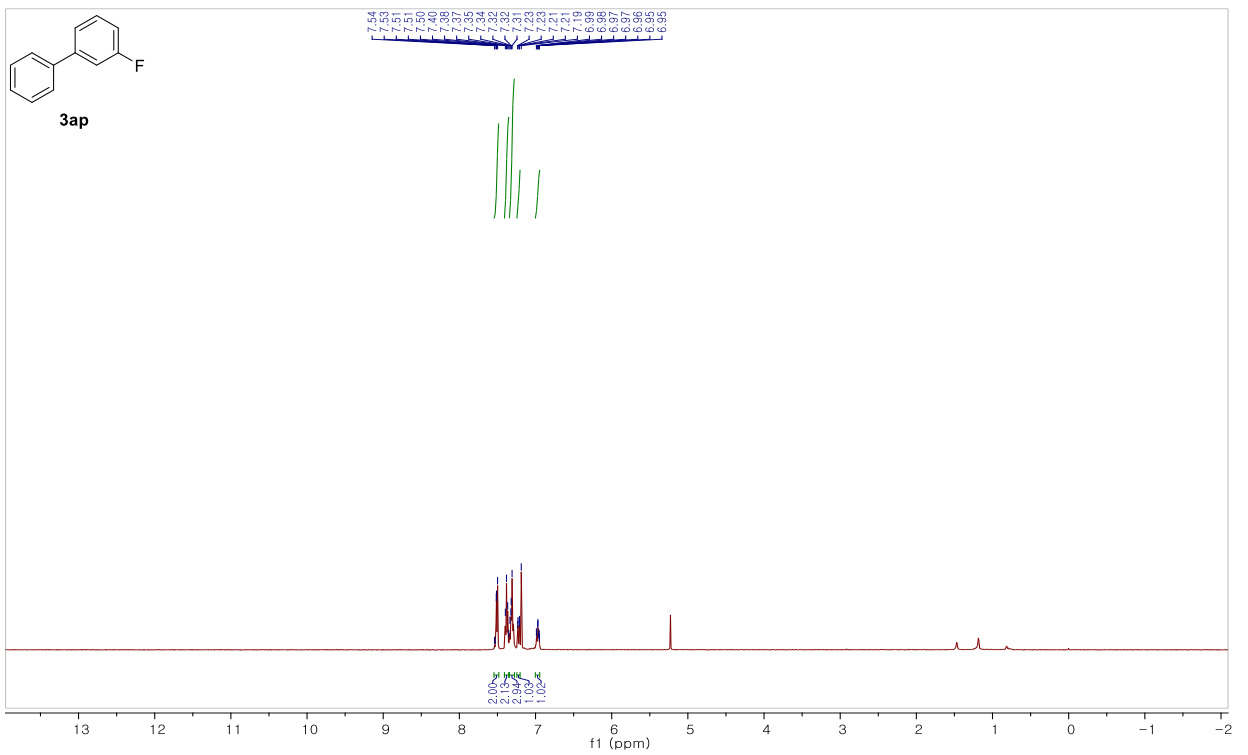

$\text{PdBr}_4(\text{n-Bu}_4\text{N})_2$

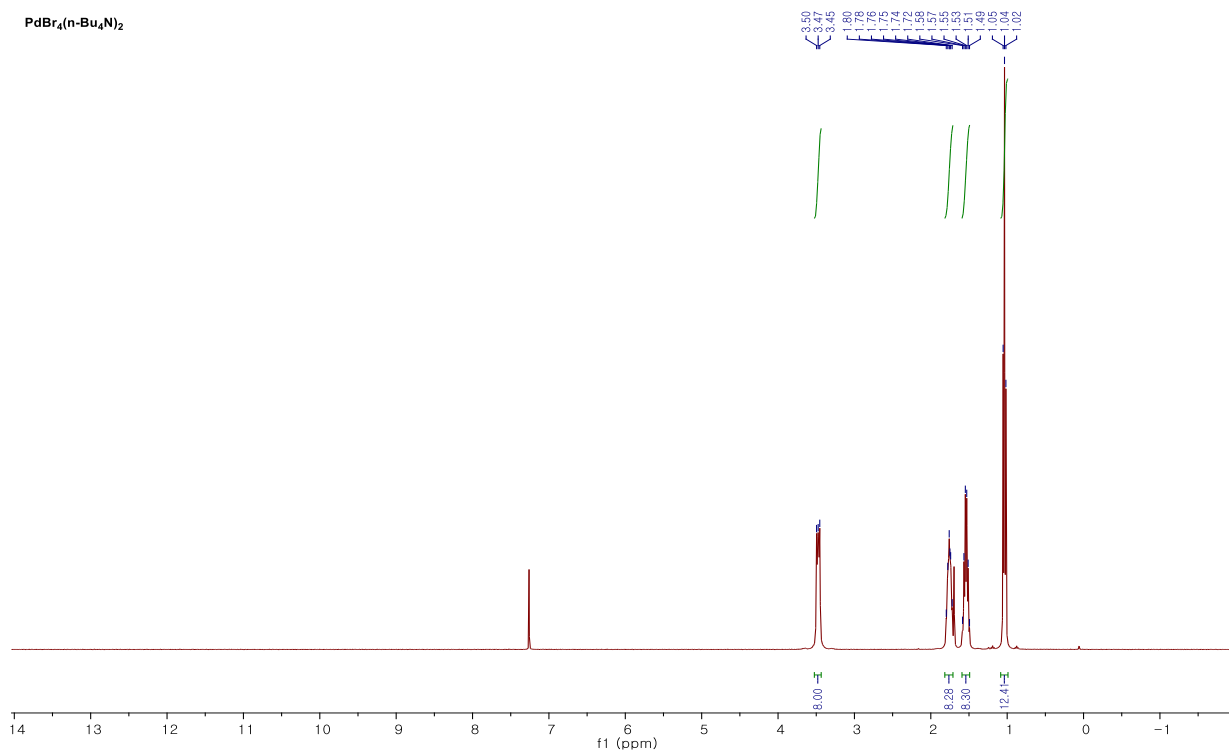

$\text{PdBr}_4(\text{n-Bu}_4\text{N})_2$

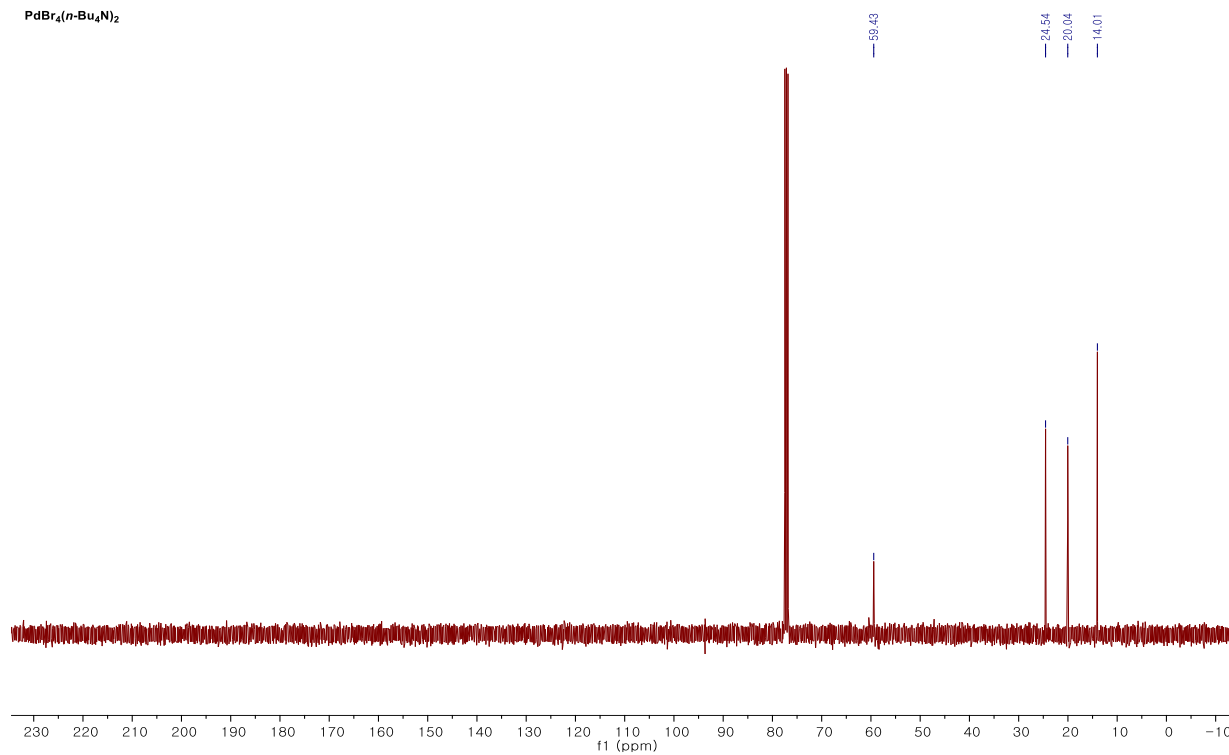

Supplement: 41467_2020_19038_MOESM1_ESM.pdf [file 41467_2020_19038_MOESM1_ESM.pdf]
