# Supplementary material for: Direct C(sp2)–H alkylation of unactivated arenes enabled by photoinduced Pd catalysis
Source: PubMed Central journal article supplement (PMC7572399; doi:10.1038/s41467-020-19038-8), 2020-10-19
Supplement: 41467_2020_19038_MOESM2_ESM.pdf [file 41467_2020_19038_MOESM2_ESM.pdf]

## Description of Additional Supplementary Files

File Name: Supplementary Data 1

Description: Cartesian coordinates of optimized geometry
